# Supplementary material for: Tumor-infiltrating Leukocyte Profiling Defines Three Immune Subtypes of NSCLC with Distinct Signaling Pathways and Genetic Alterations
Source: PubMed Central journal article supplement (PMC10263066; doi:10.1158/2767-9764.crc-22-0415), 2023-06-13
Supplement: crc-22-0415-s01.pdf [file crc-22-0415-s01.pdf]

Adenocarcinoma; Tumor (n=155), non-tumor lung (n=117)

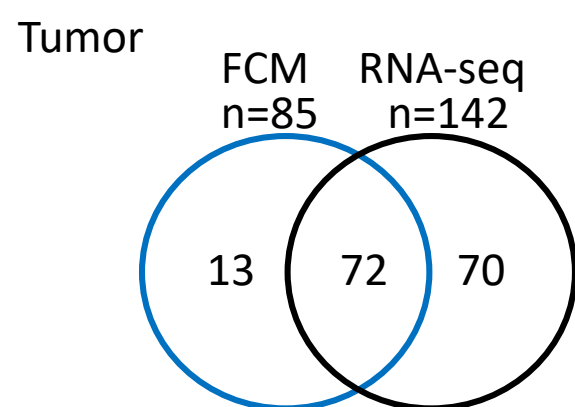

Cases in which FCM was performed (n=85)

|                | Done | Not-done |
|----------------|------|----------|
| IHC            | 65   | 20       |
| WES            | 69   | 16       |
| TCR repertoire | 55   | 30       |
| Metabolome     | 29   | 56       |

FCM; flow cytometry  
IHC; immunohistochemistry  
WES; whole exome seq  
TCR; T cell receptor

Squamous cell carcinoma; Tumor (n=80), non-tumor lung (n=65)

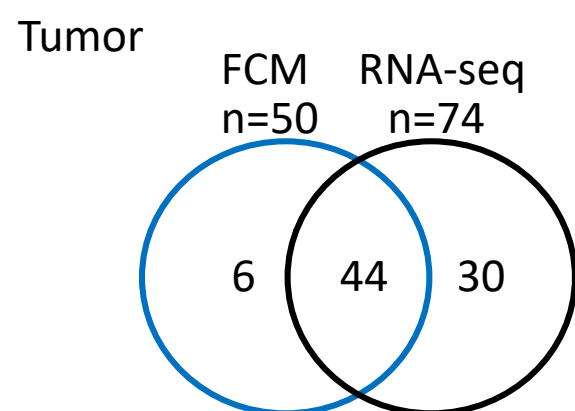

Cases in which FCM was performed (n=50)

|                | Done | Not-done |
|----------------|------|----------|
| IHC            | 44   | 6        |
| WES            | 45   | 5        |
| TCR repertoire | 36   | 14       |
| Metabolome     | 24   | 26       |

Other lung cancer ; Tumor (n=46), non-tumor lung (n=37)

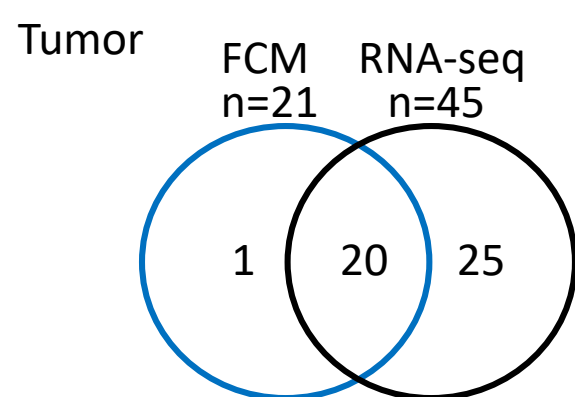

**Figure S1.** The number of patients and analyses in LUAD and LUSQ. The immunohistochemistry of tissue microarray, whole exome sequencing, TCR repertoire analysis, and metabolome analysis were performed in the cases FCM was conducted.
