# Supplementary material for: Tumor-infiltrating Leukocyte Profiling Defines Three Immune Subtypes of NSCLC with Distinct Signaling Pathways and Genetic Alterations
Source: PubMed Central journal article supplement (PMC10263066; doi:10.1158/2767-9764.crc-22-0415), 2023-06-13
Supplement: crc-22-0415-s04.pdf [file crc-22-0415-s04.pdf]

Fig. S4

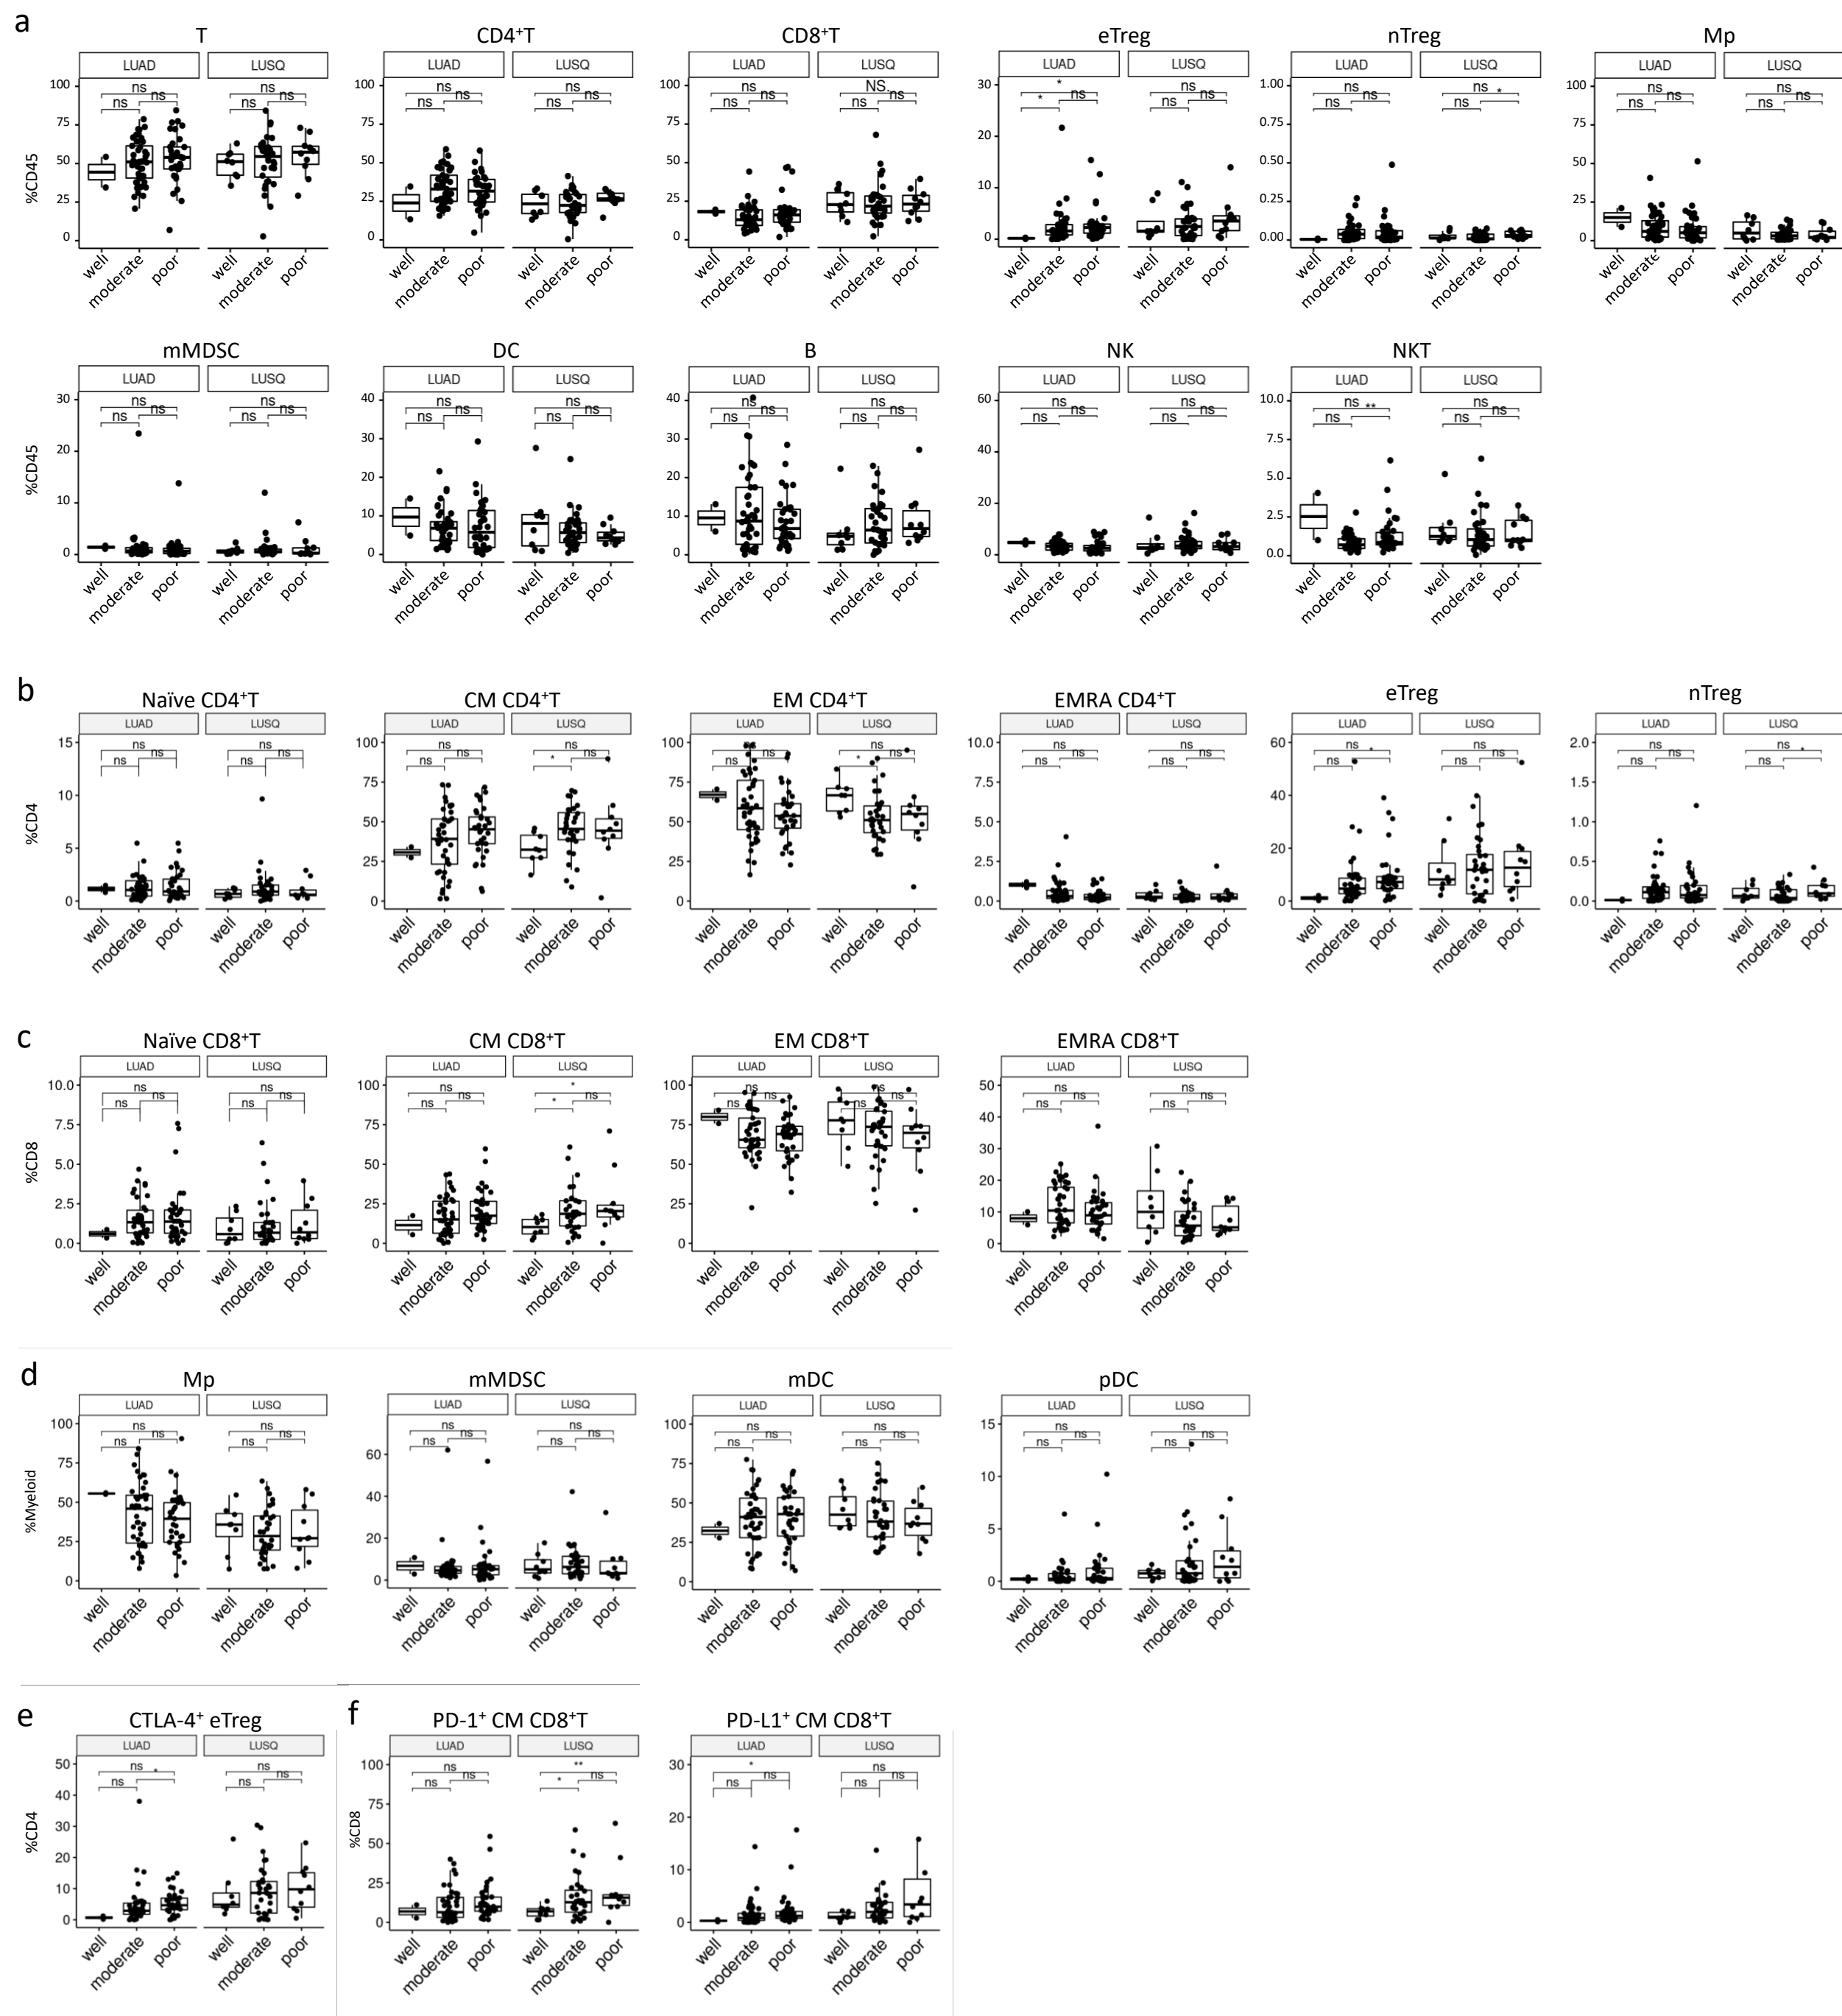

**Figure S4.** Relation of immune cell types with histological grade. LUAD (n=77) (well differentiated; n=2, moderately differentiated; n=41, poorly differentiated; n=34) and LUSQ (n=50) (well differentiated; n=8, moderately differentiated; n=32, poorly differentiated; n=10). (a–d) %CD45 of immune cell type (a), %CD4 of CD4<sup>+</sup> T cell subset (b), %CD8 of CD8<sup>+</sup> T cell subset (c), and %myeloid of myeloid cell type (d) are presented in well, moderately, and poorly differentiated LUAD and LUSQ. (e) %CD4 of CTLA-4<sup>+</sup> eTregs in LUAD and LUSQ. (f) %CD8 of PD-1<sup>+</sup> and PD-L1<sup>+</sup> CM CD8<sup>+</sup> T cells in LUAD and LUSQ. ns; not significant. \* p<0.05. \*\* P<0.01.
