# Supplementary material for: Tumor-infiltrating Leukocyte Profiling Defines Three Immune Subtypes of NSCLC with Distinct Signaling Pathways and Genetic Alterations
Source: PubMed Central journal article supplement (PMC10263066; doi:10.1158/2767-9764.crc-22-0415), 2023-06-13
Supplement: crc-22-0415-s05.pdf [file crc-22-0415-s05.pdf]

Fig. S5

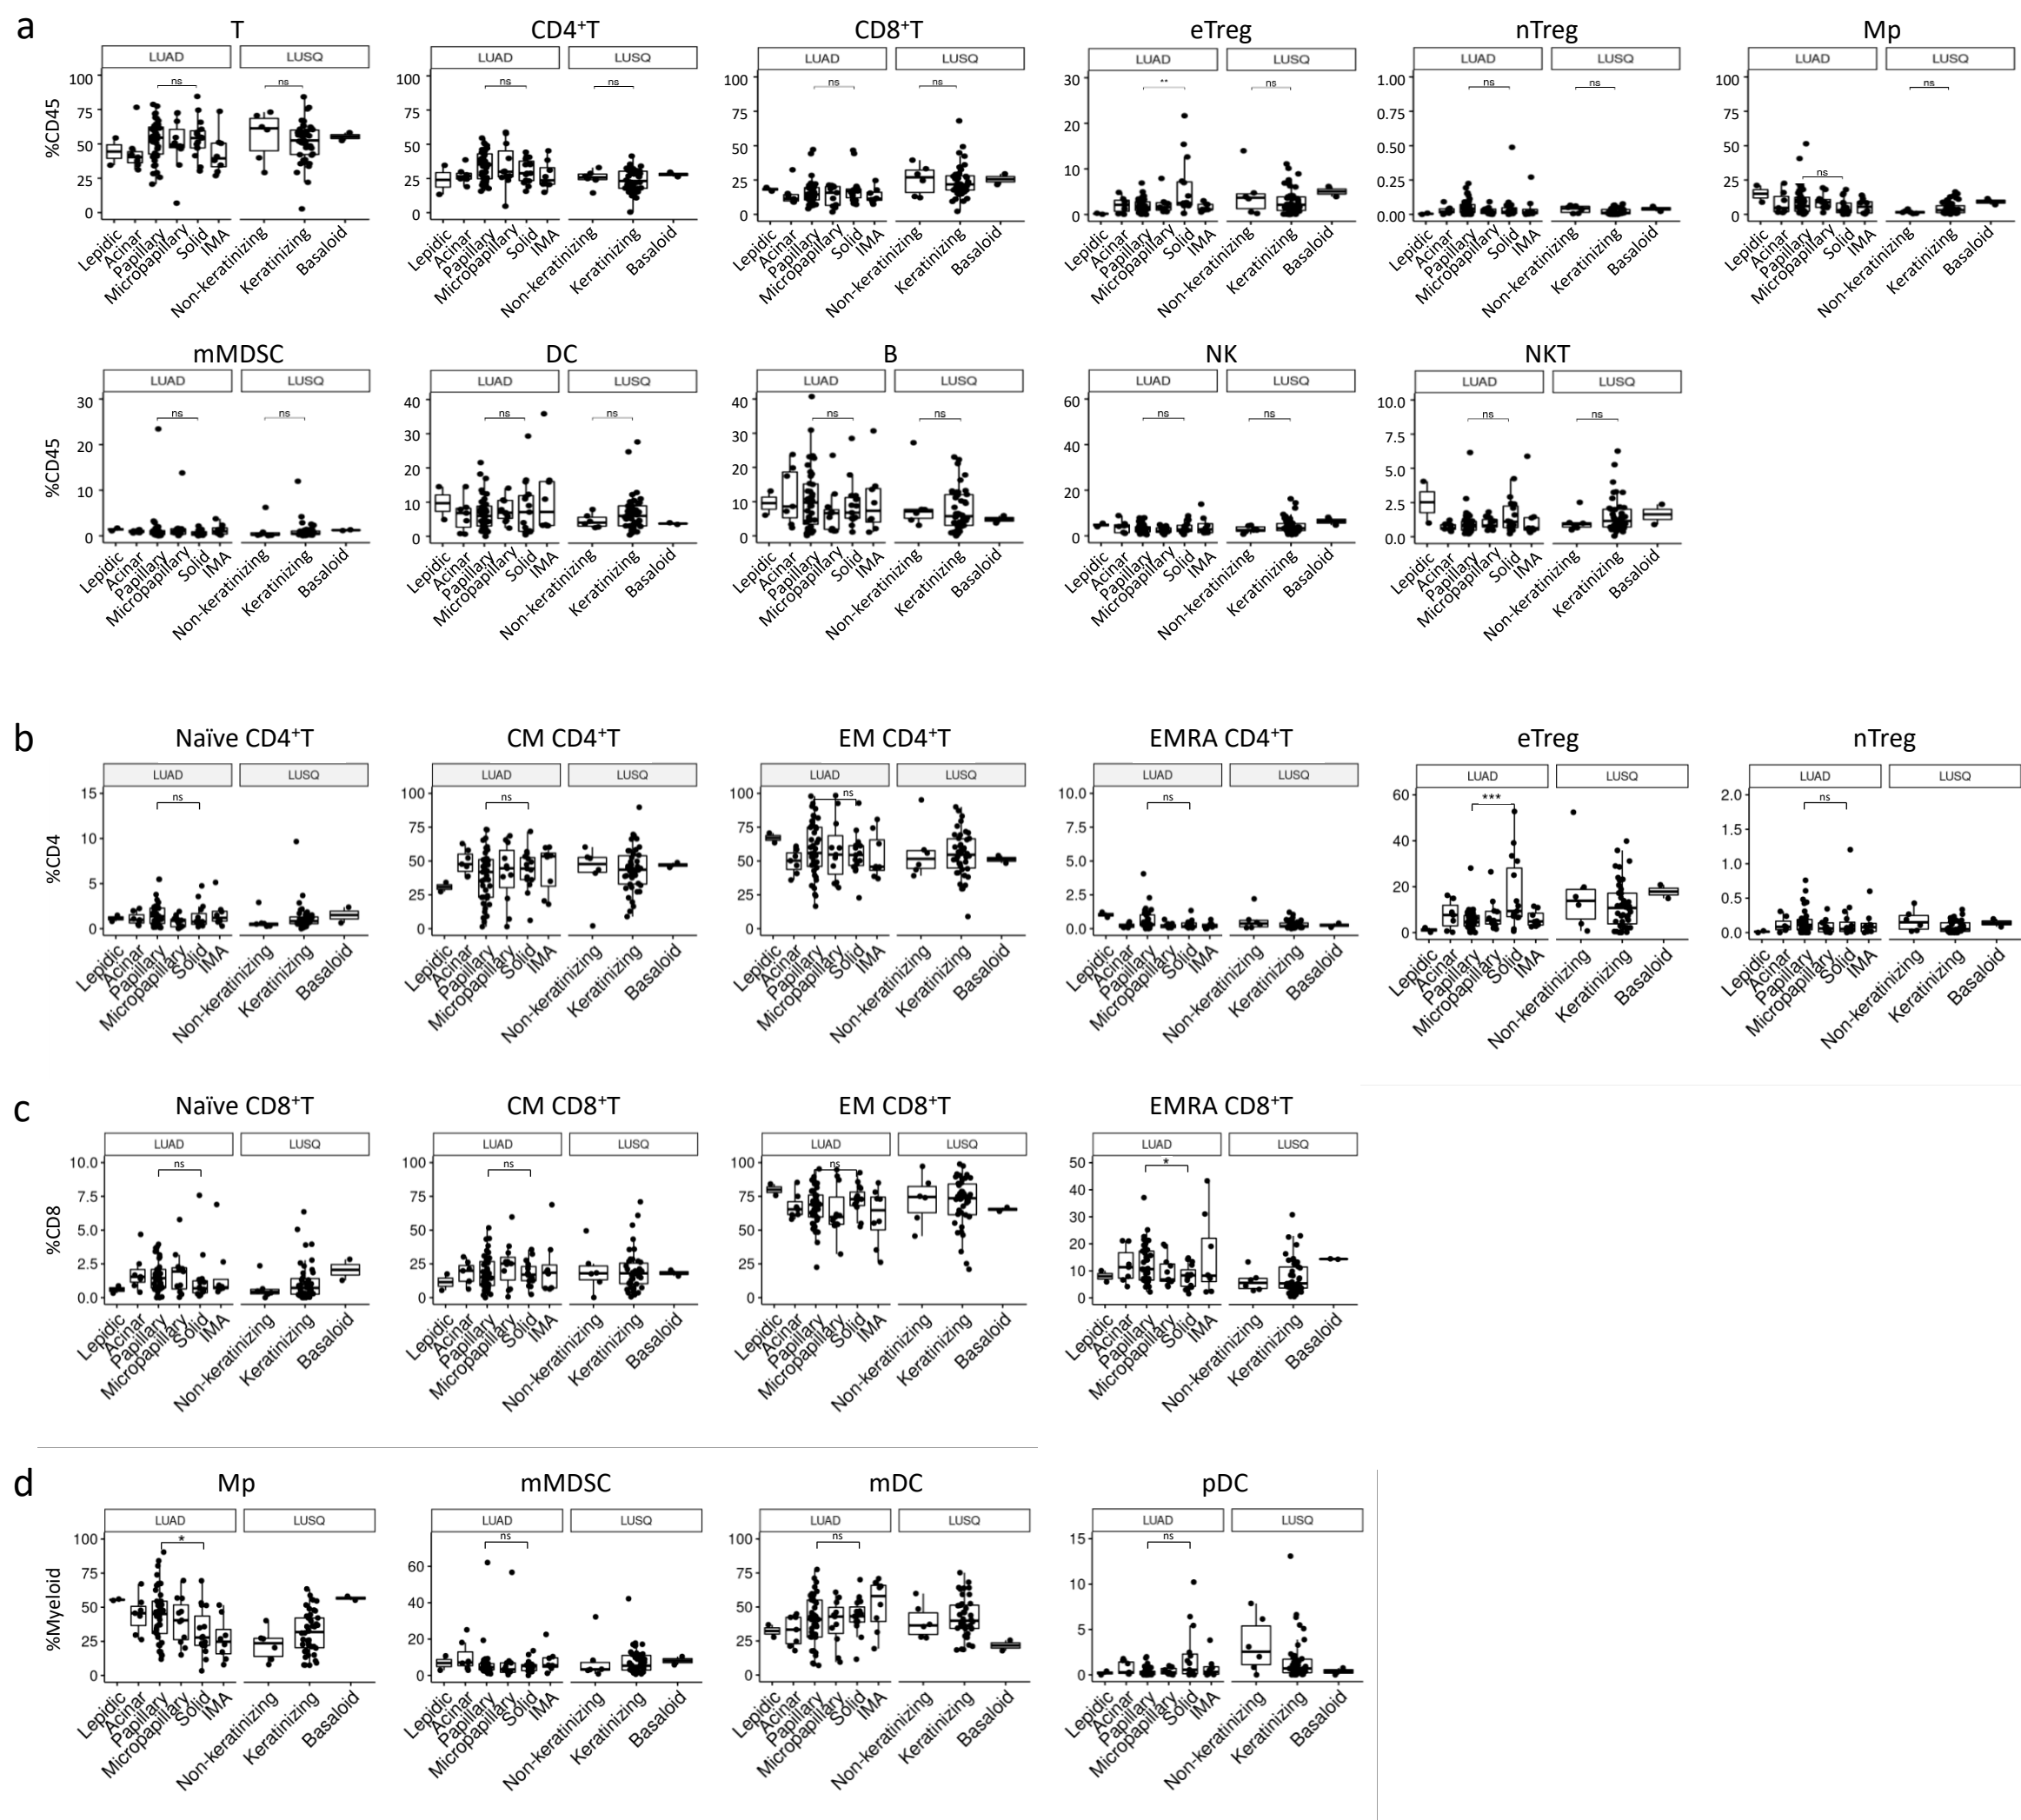

**Figure S5.** Relation of immune cell types with WHO classification. LUAD (n=82) (lepidic; n=2, acinar; n=7, papillary; n=39, micropapillary; n=11, solid; n=15, IMA; n=8) and LUSQ (n=50) (non-keratinizing; n=6, keratinizing; n=42, basaloid; n=2). (a–d) %CD45 of immune cell type (a), %CD4 of CD4<sup>+</sup> T cell subset (b), %CD8 of CD8<sup>+</sup> T cell subset (c), and %myeloid of myeloid cell type (d) are presented following the WHO classification of LUAD and LUSQ. ns; not significant. \* p<0.05. \*\*P<0.01. \*\*\*P<0.001.
