# Supplementary material for: Tumor-infiltrating Leukocyte Profiling Defines Three Immune Subtypes of NSCLC with Distinct Signaling Pathways and Genetic Alterations
Source: PubMed Central journal article supplement (PMC10263066; doi:10.1158/2767-9764.crc-22-0415), 2023-06-13
Supplement: crc-22-0415-s06.pdf [file crc-22-0415-s06.pdf]

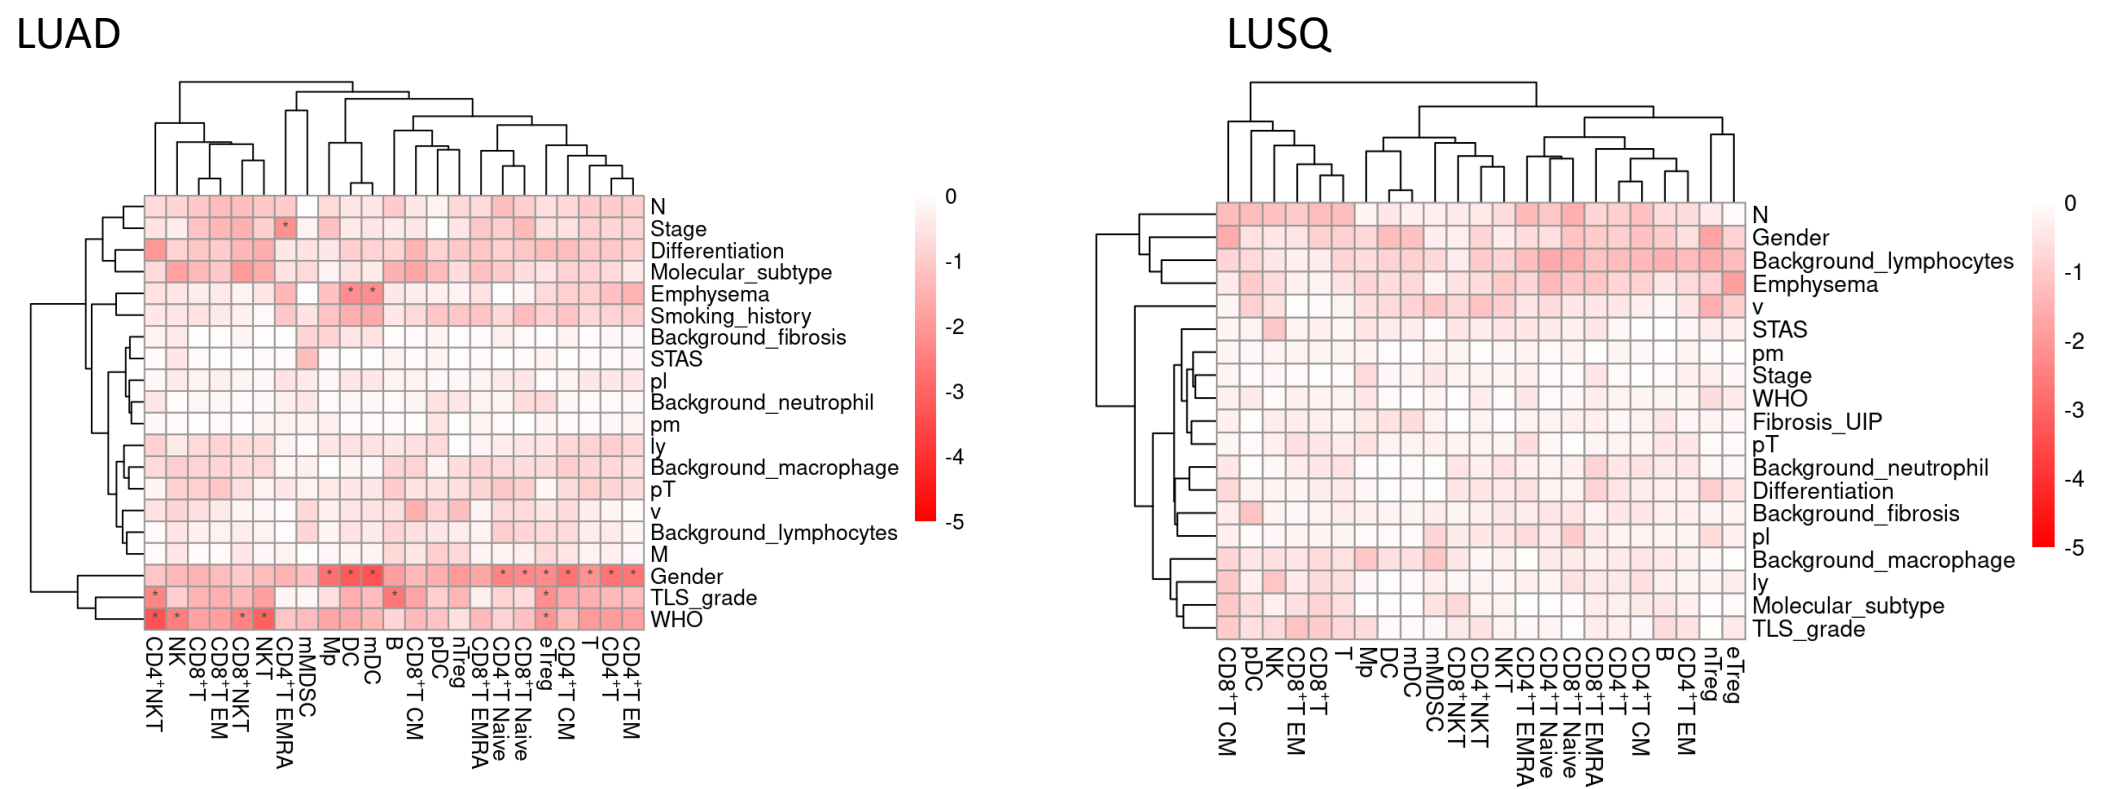

**Figure S6.** Relationship between the number of immune cell types and clinicopathological factors. Cells in the matrix represent the 1-Pearson correlation coefficient between cell density of the indicated immune cell composition and clinicopathological factors in LUAD (left) and LUSQ (right). \*  $p < 0.05$ .
