# Supplementary material for: Tumor-infiltrating Leukocyte Profiling Defines Three Immune Subtypes of NSCLC with Distinct Signaling Pathways and Genetic Alterations
Source: PubMed Central journal article supplement (PMC10263066; doi:10.1158/2767-9764.crc-22-0415), 2023-06-13
Supplement: crc-22-0415-s07.pdf [file crc-22-0415-s07.pdf]

Fig. S7

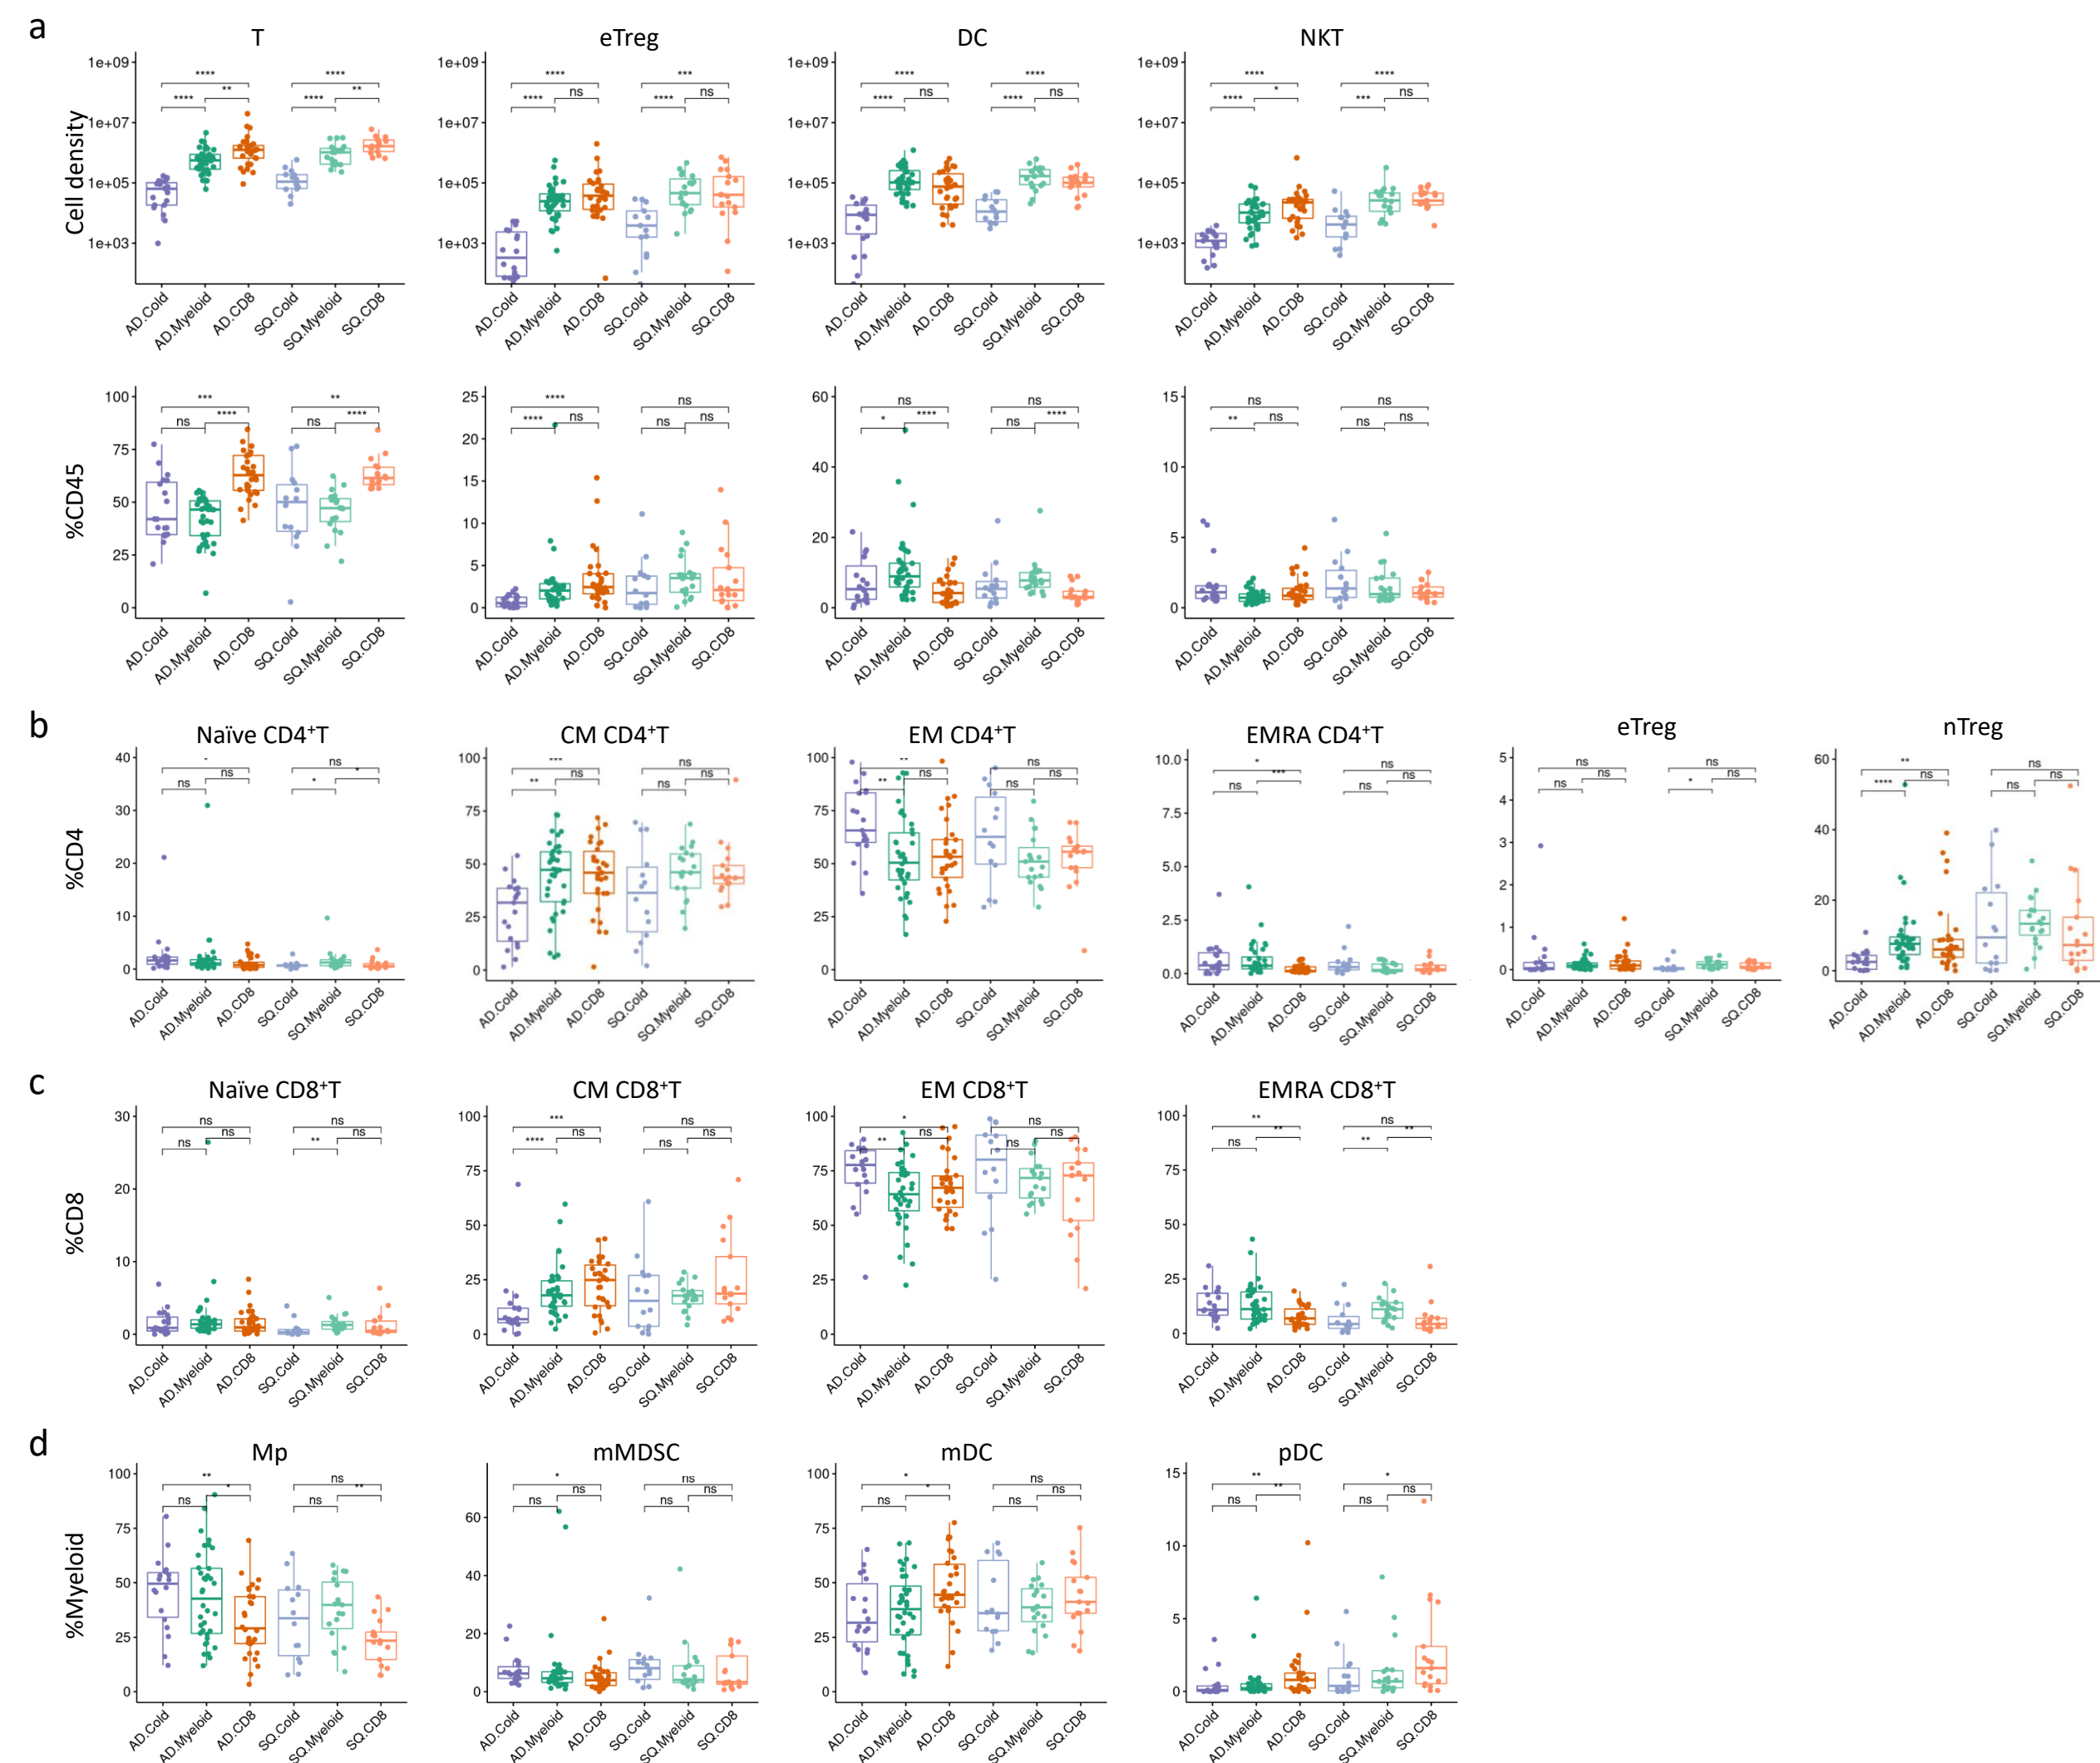

**Figure S7.** Number and percentage of immune cell types, CD4<sup>+</sup> T cell subsets, CD8 T<sup>+</sup> cell subsets, and myeloid cell type in respective immune subtypes. (a–d) Cell density and %CD45 of immune cell type (a), %CD4 of CD4<sup>+</sup> T cell subset (b), %CD8 of CD8<sup>+</sup> T cell subset (c), and %myeloid of myeloid cell type (d) are presented in respective immune subtypes of LUAD and LUSQ. ns; not significant. \* p<0.05. \*\*P<0.01. \*\*\*P<0.001. \*\*\*\*P<0.0001.
