# Supplementary material for: Tumor-infiltrating Leukocyte Profiling Defines Three Immune Subtypes of NSCLC with Distinct Signaling Pathways and Genetic Alterations
Source: PubMed Central journal article supplement (PMC10263066; doi:10.1158/2767-9764.crc-22-0415), 2023-06-13
Supplement: crc-22-0415-s08.pdf [file crc-22-0415-s08.pdf]

Fig. S8

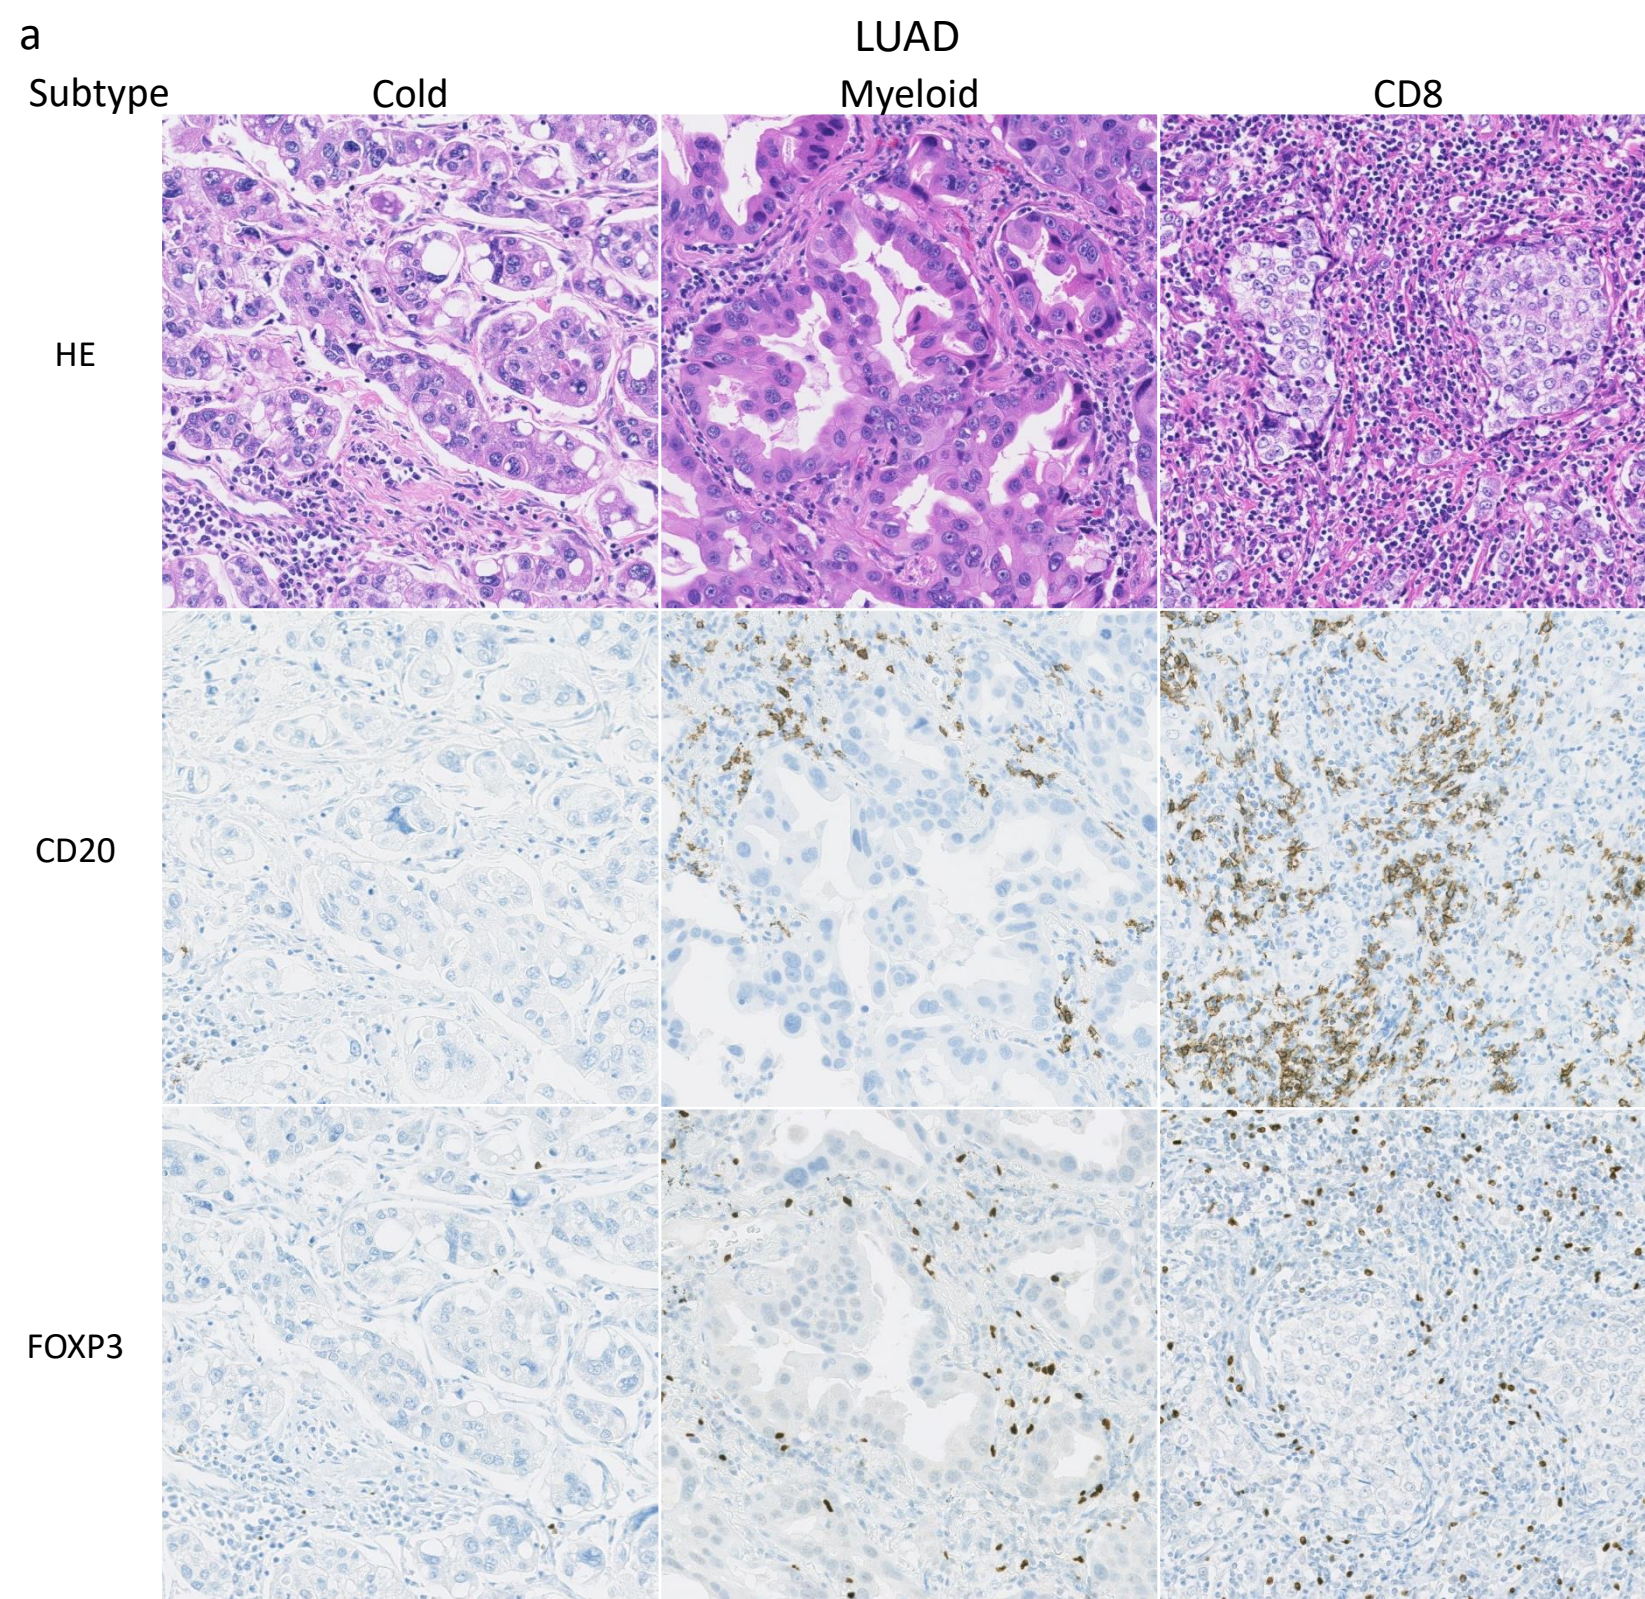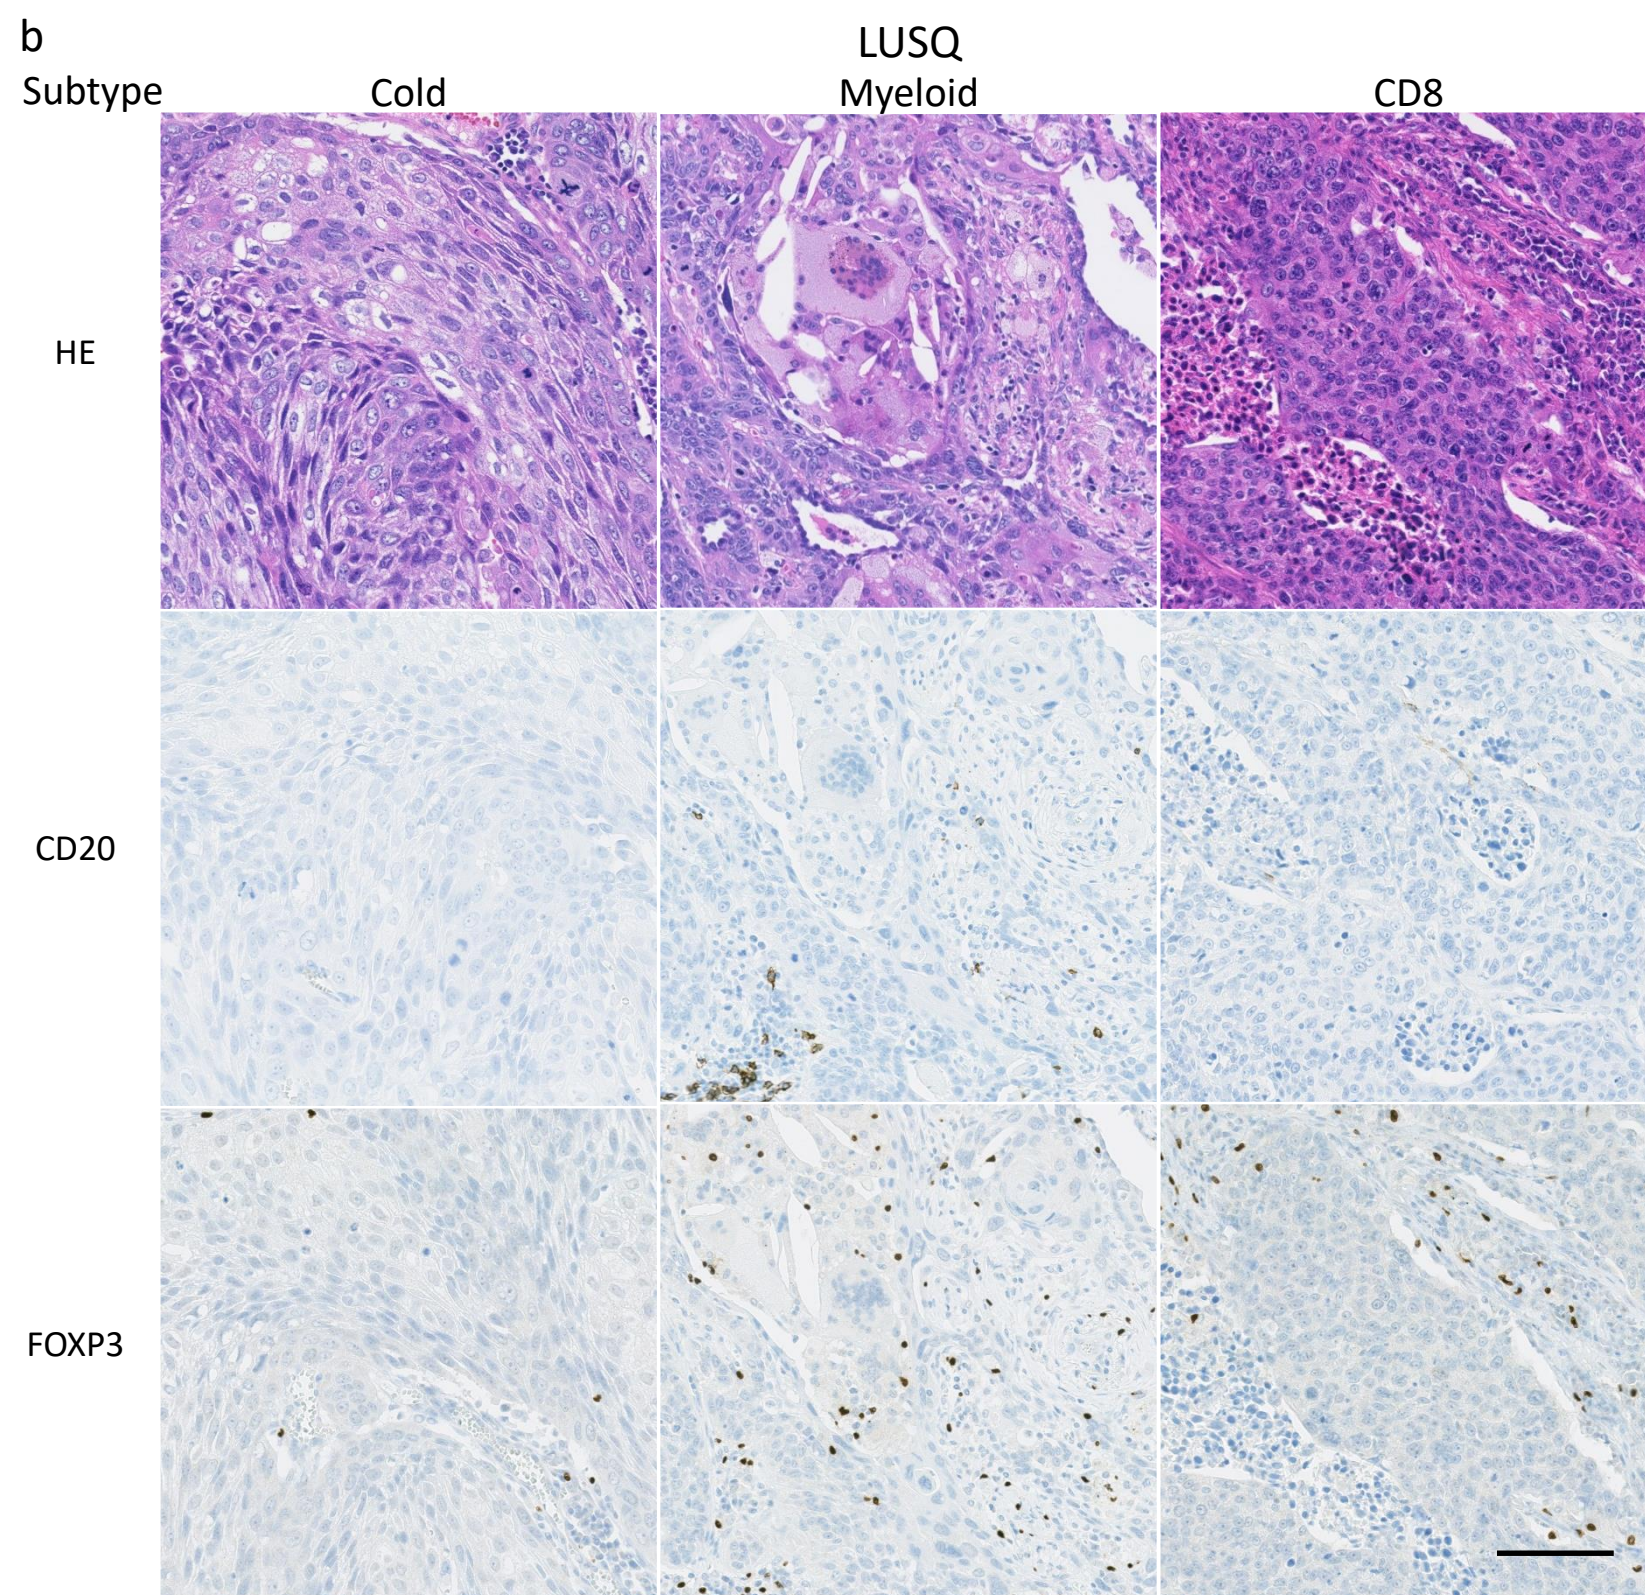

Scale=100 $\mu$ m



**Figure S8.** IHC of LUAD and LUSQ tissues of a representative case from immune subtypes. The antibodies against CD20 and FOXP3 are used in LUAD (a) and LUSQ tissues (b).
