# Supplementary material for: Tumor-infiltrating Leukocyte Profiling Defines Three Immune Subtypes of NSCLC with Distinct Signaling Pathways and Genetic Alterations
Source: PubMed Central journal article supplement (PMC10263066; doi:10.1158/2767-9764.crc-22-0415), 2023-06-13
Supplement: crc-22-0415-s09.pdf [file crc-22-0415-s09.pdf]

Fig. S9

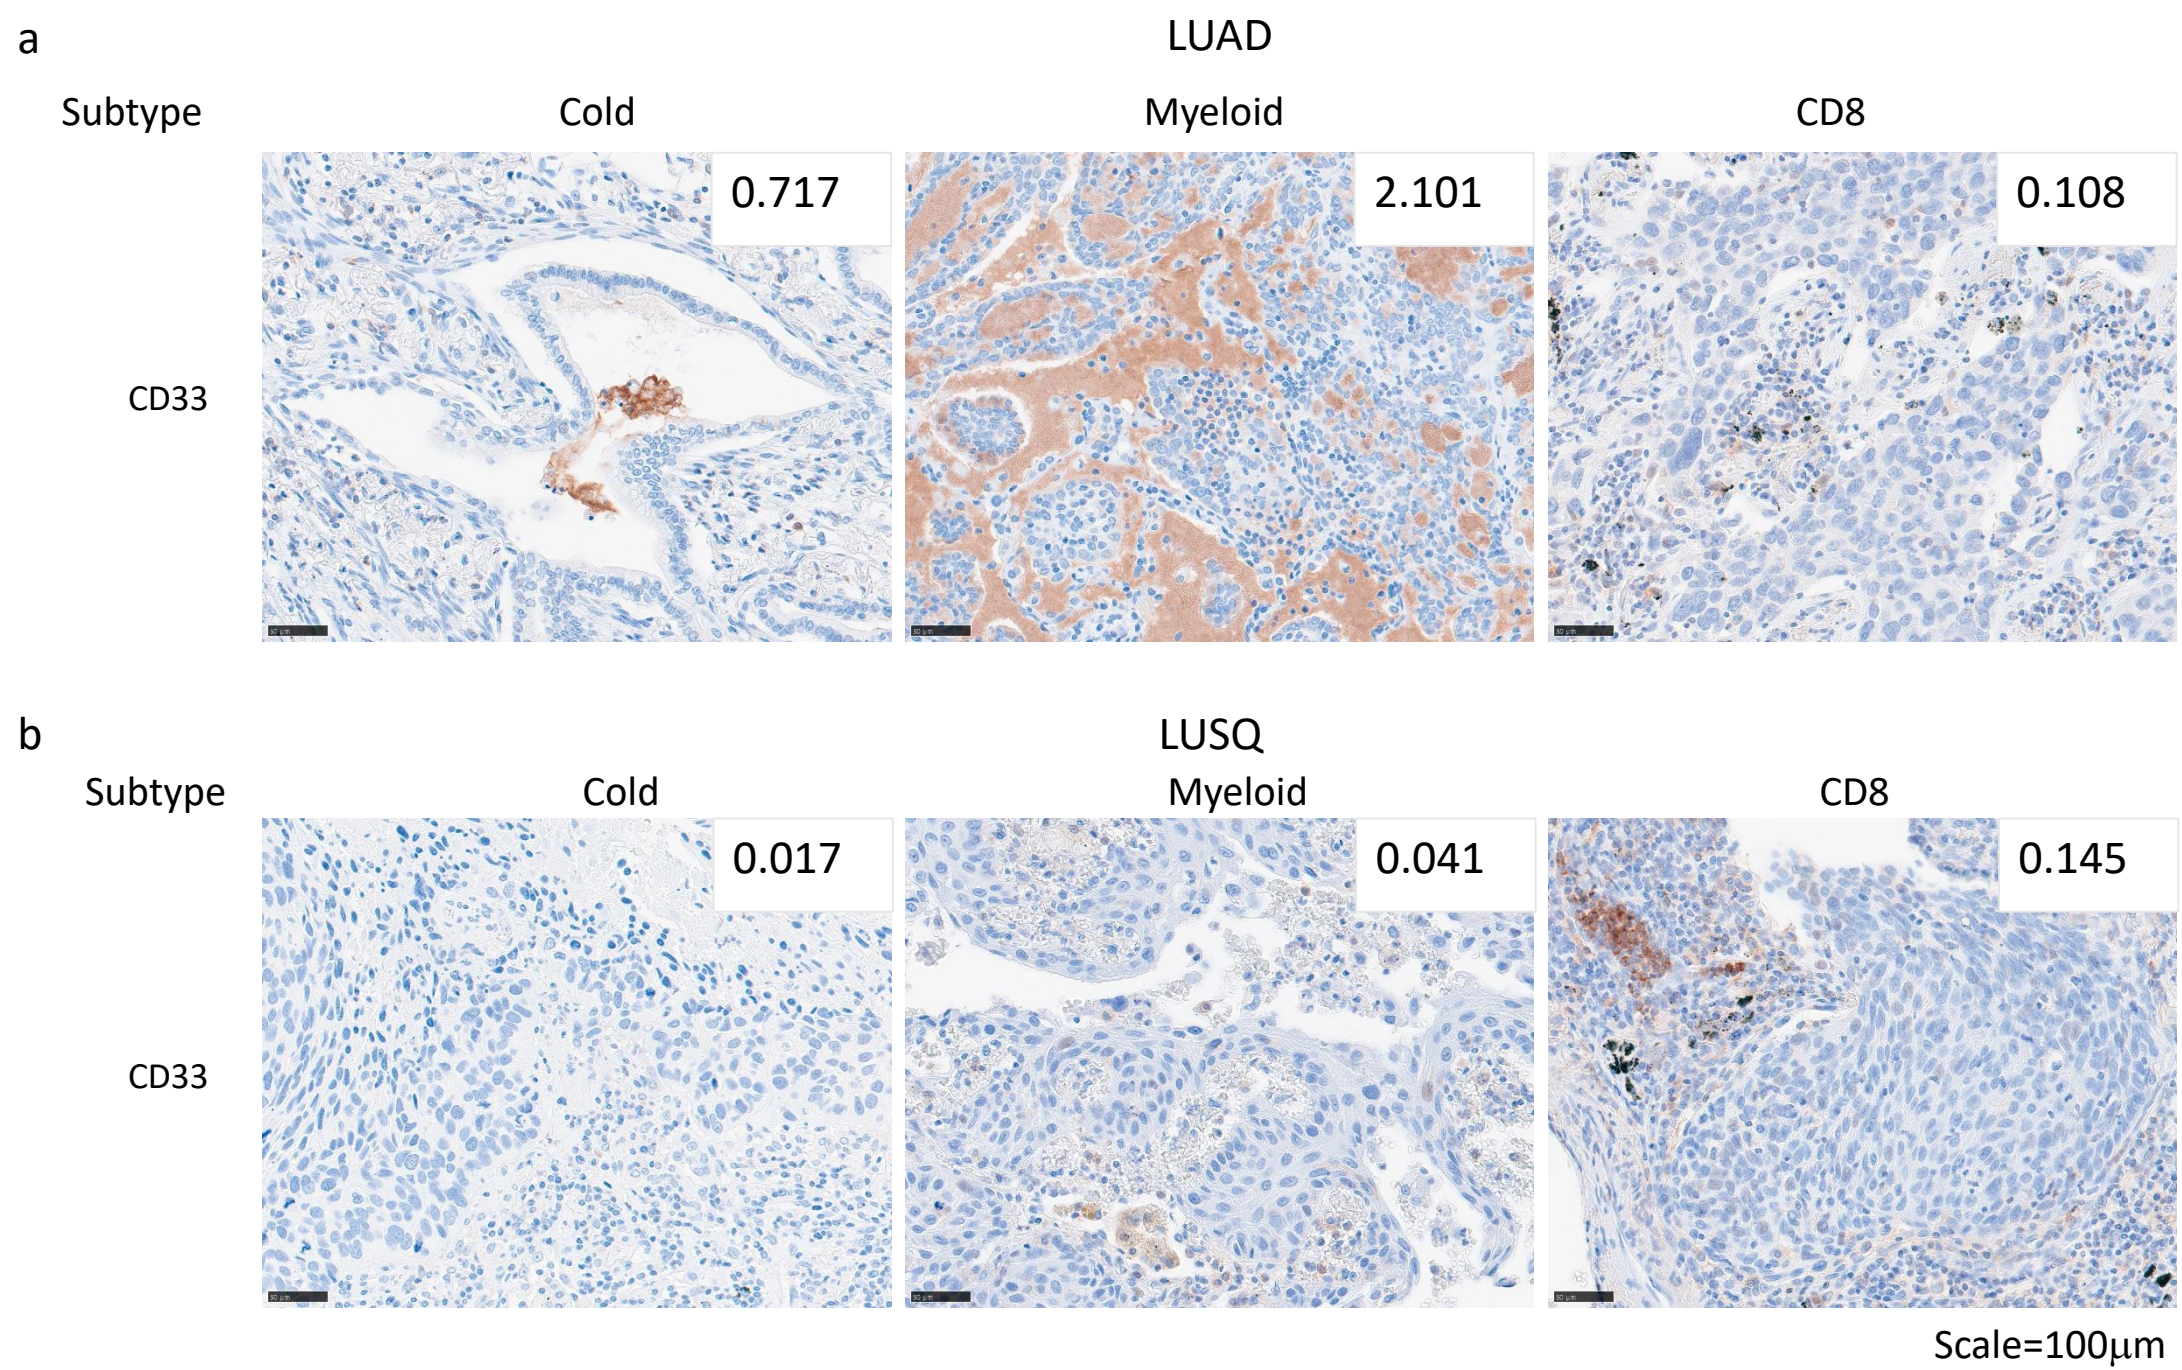

**Figure S9.** CD33 IHC of LUAD and LUSQ tissues of a representative case from immune subtypes. (a) LUAD. (b) LUSQ. The number is the ratio of CD33 positive staining area per tissue area (percentage).
