# Supplementary material for: Tumor-infiltrating Leukocyte Profiling Defines Three Immune Subtypes of NSCLC with Distinct Signaling Pathways and Genetic Alterations
Source: PubMed Central journal article supplement (PMC10263066; doi:10.1158/2767-9764.crc-22-0415), 2023-06-13
Supplement: crc-22-0415-s10.pdf [file crc-22-0415-s10.pdf]

Fig. S10

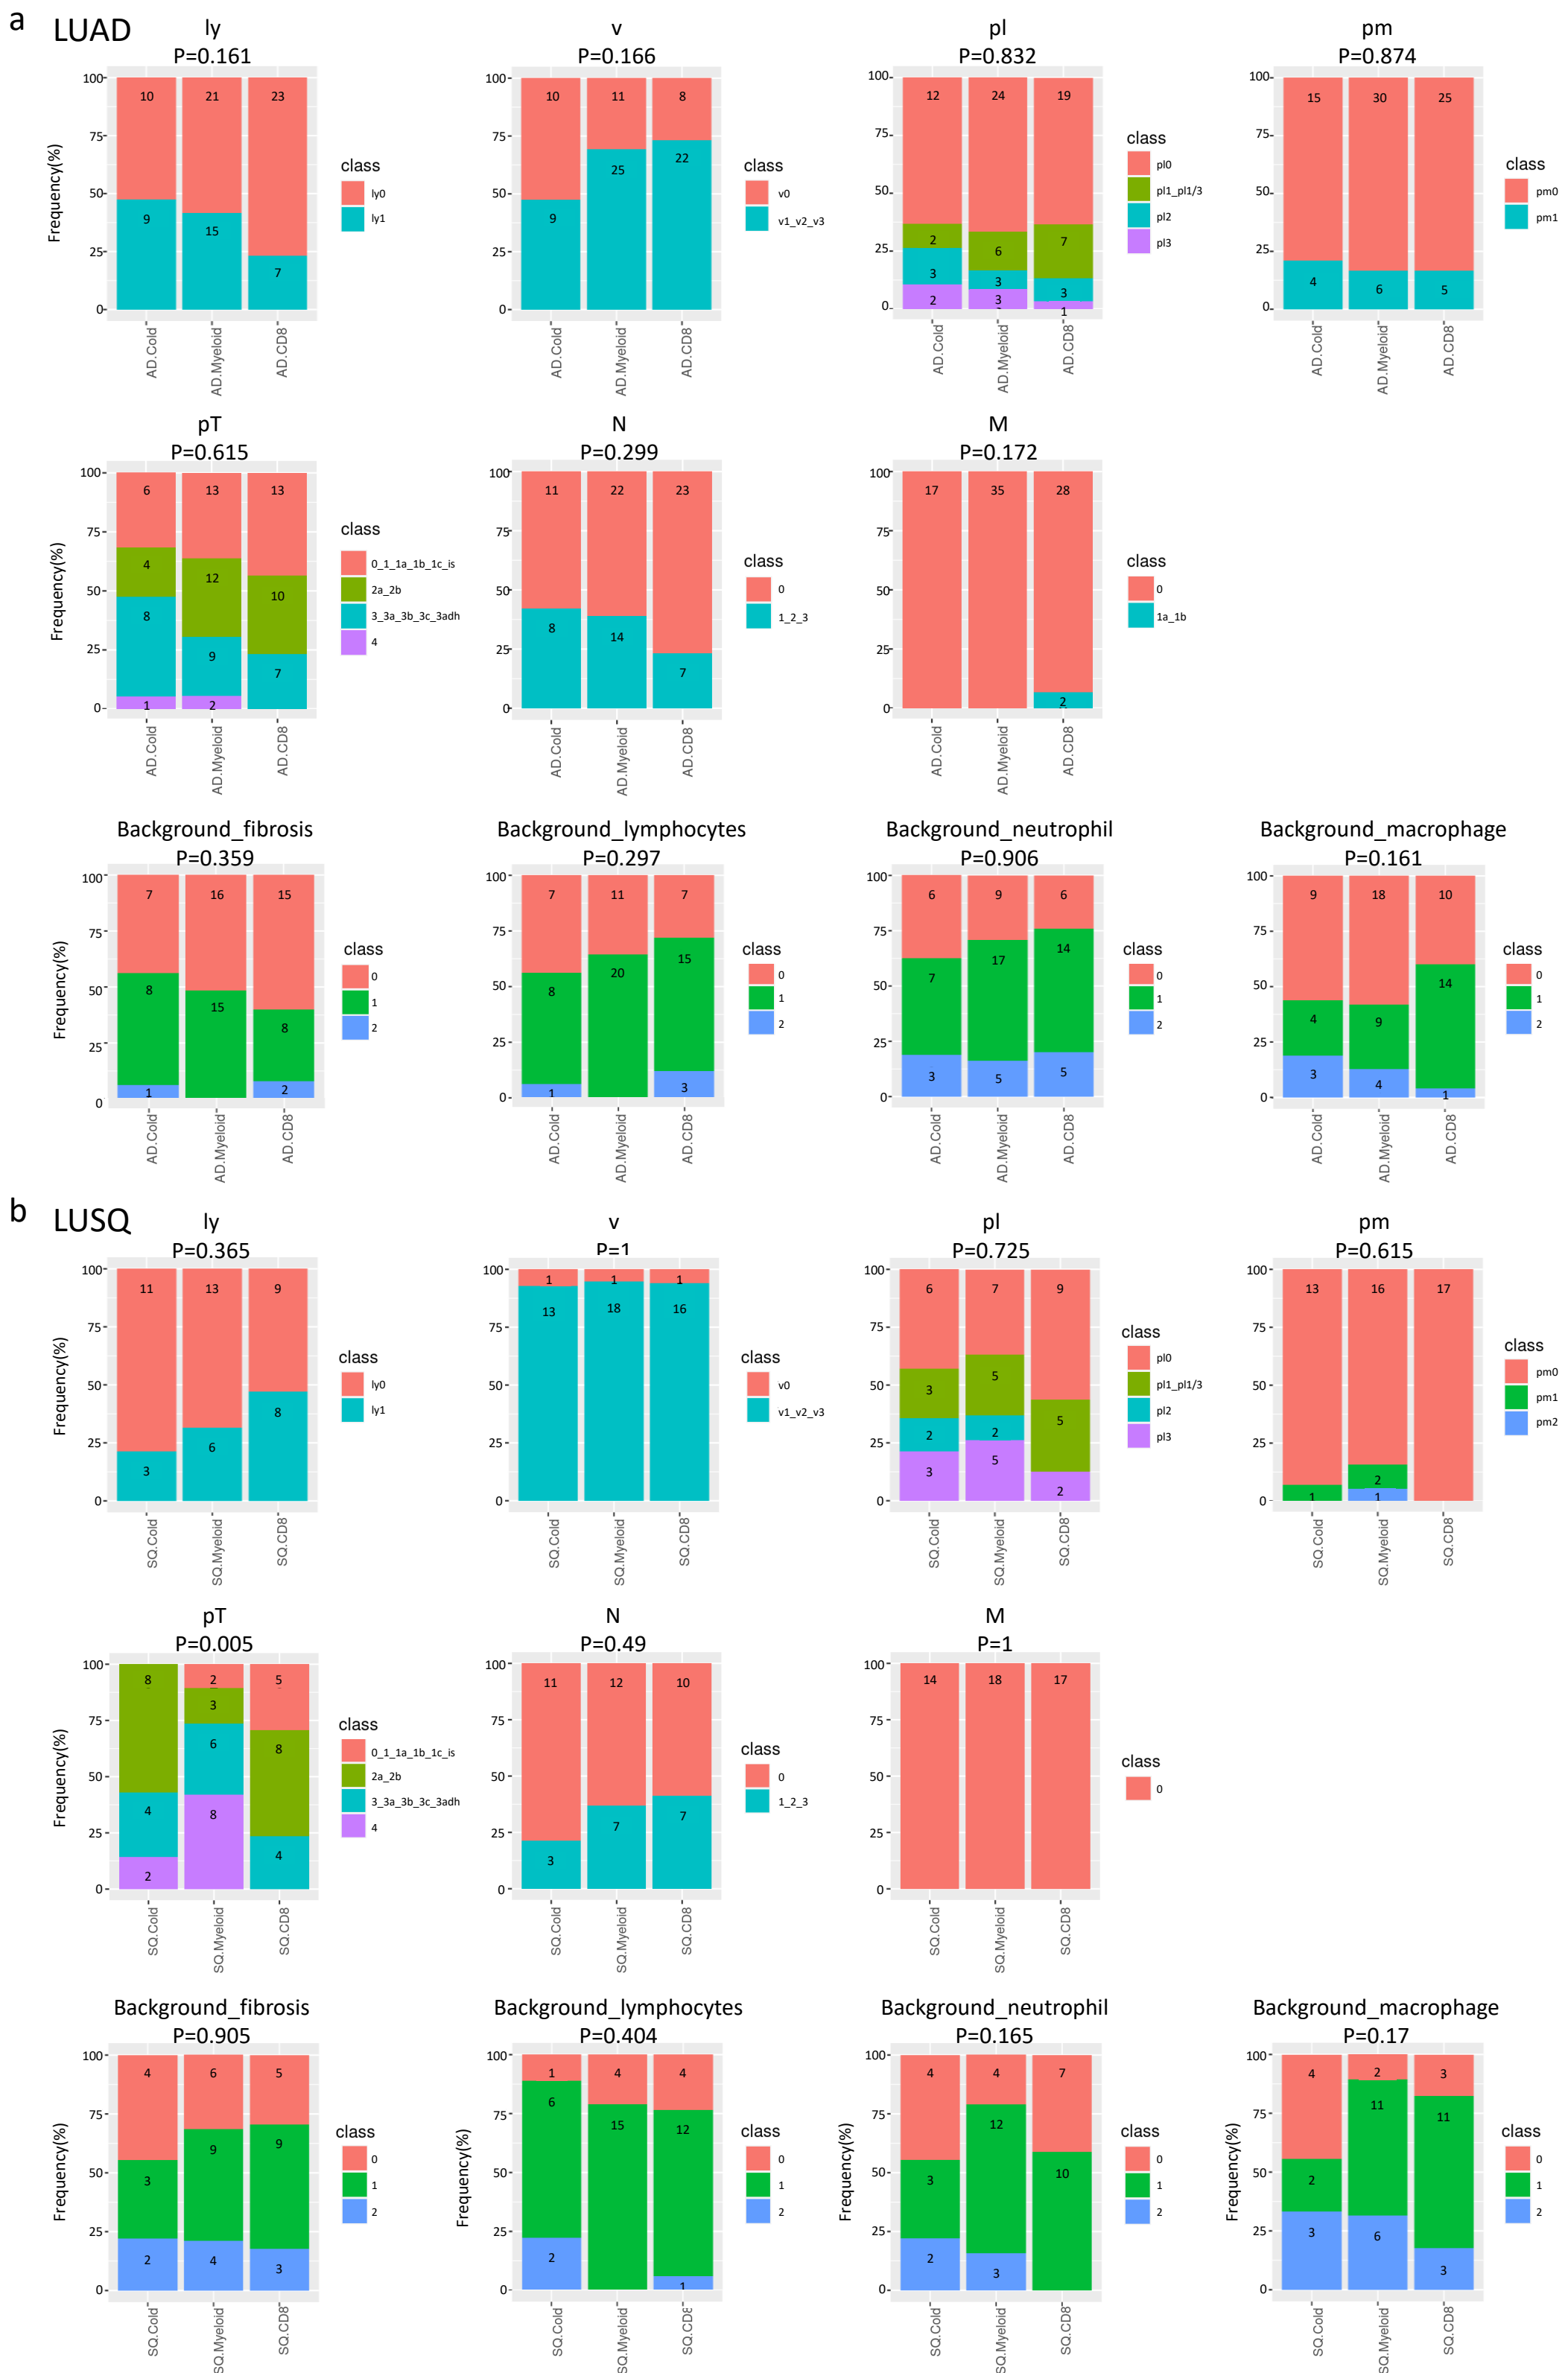

**Figure S10.** Characterization of histopathological factors in respective immune subtypes of LUAD, LUSQ, and background NAT tissues. Ly: lymphatic vessel invasion, v: vascular invasion, pl; pleural invasion, pm: pulmonary metastasis, pT: tumor size, N: lymph node metastasis, M: distant metastasis. In NATs, fibrosis and frequencies of lymphocytes, neutrophils, and macrophages were assessed. The percentage of each classification in immune subtype was plotted in LUAD (a) and LUSQ (b) with NAT. The number of patients is specified in each column.
