# Supplementary material for: Tumor-infiltrating Leukocyte Profiling Defines Three Immune Subtypes of NSCLC with Distinct Signaling Pathways and Genetic Alterations
Source: PubMed Central journal article supplement (PMC10263066; doi:10.1158/2767-9764.crc-22-0415), 2023-06-13
Supplement: crc-22-0415-s11.pdf [file crc-22-0415-s11.pdf]

Fig. S11

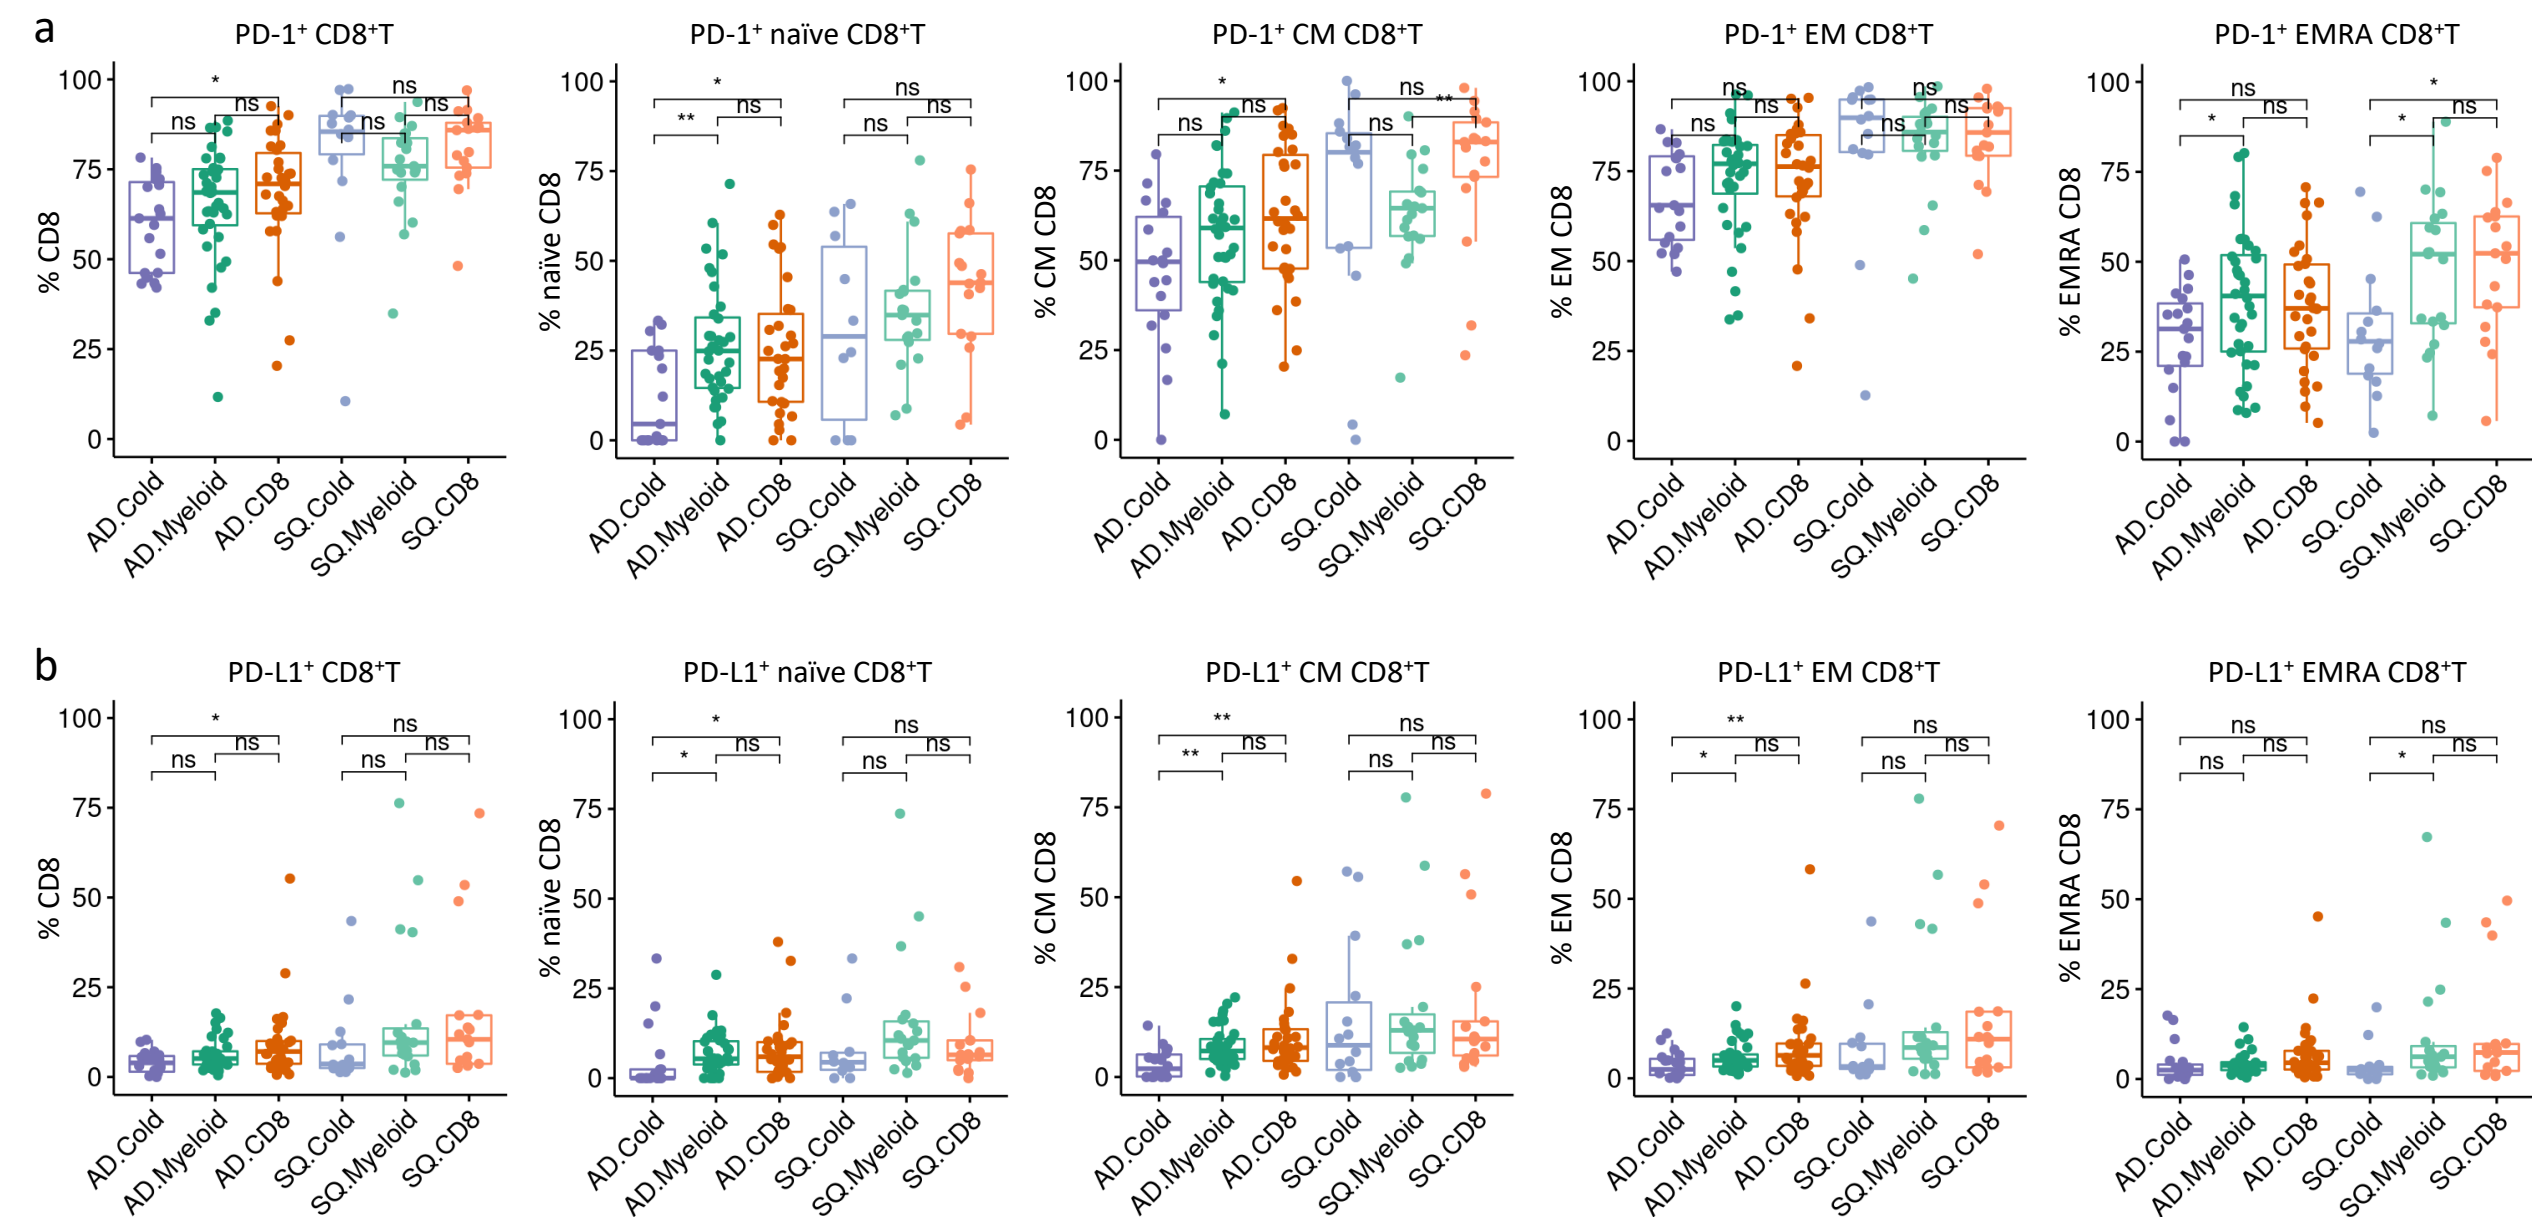

**Figure S11.** Percentage of PD-1<sup>+</sup> CD8<sup>+</sup> T<sup>+</sup> and PD-L1<sup>+</sup> CD8<sup>+</sup> T<sup>+</sup> cells in respective immune subtypes. (a, b) Data were presented as a percentage of PD-1<sup>+</sup> cells (a) and PD-L1<sup>+</sup> cells (b) per indicated CD8<sup>+</sup> T cell subset in LUAD and LUSQ. % naïve CD8; percentage of PD-1<sup>+</sup> or PD-L1<sup>+</sup> naïve CD8<sup>+</sup> T cell subset per total of naïve CD8<sup>+</sup> T cells. % CM CD8; percentage of PD-1<sup>+</sup> or PD-L1<sup>+</sup> CM CD8<sup>+</sup> T cell subset per total of CM CD8<sup>+</sup> T cells. % EM CD8; percentage of PD-1<sup>+</sup> or PD-L1<sup>+</sup> EM CD8<sup>+</sup> T cell subset per total of EM CD8<sup>+</sup> T cells. % EMRA CD8; percentage of PD-1<sup>+</sup> or PD-L1<sup>+</sup> EMRA CD8<sup>+</sup> T cell subset per total of EMRA CD8<sup>+</sup> T cells. ns; not significant. \* p<0.05. \*\*P<0.01.
