# Supplementary material for: Tumor-infiltrating Leukocyte Profiling Defines Three Immune Subtypes of NSCLC with Distinct Signaling Pathways and Genetic Alterations
Source: PubMed Central journal article supplement (PMC10263066; doi:10.1158/2767-9764.crc-22-0415), 2023-06-13
Supplement: crc-22-0415-s12.pdf [file crc-22-0415-s12.pdf]

Fig. S12

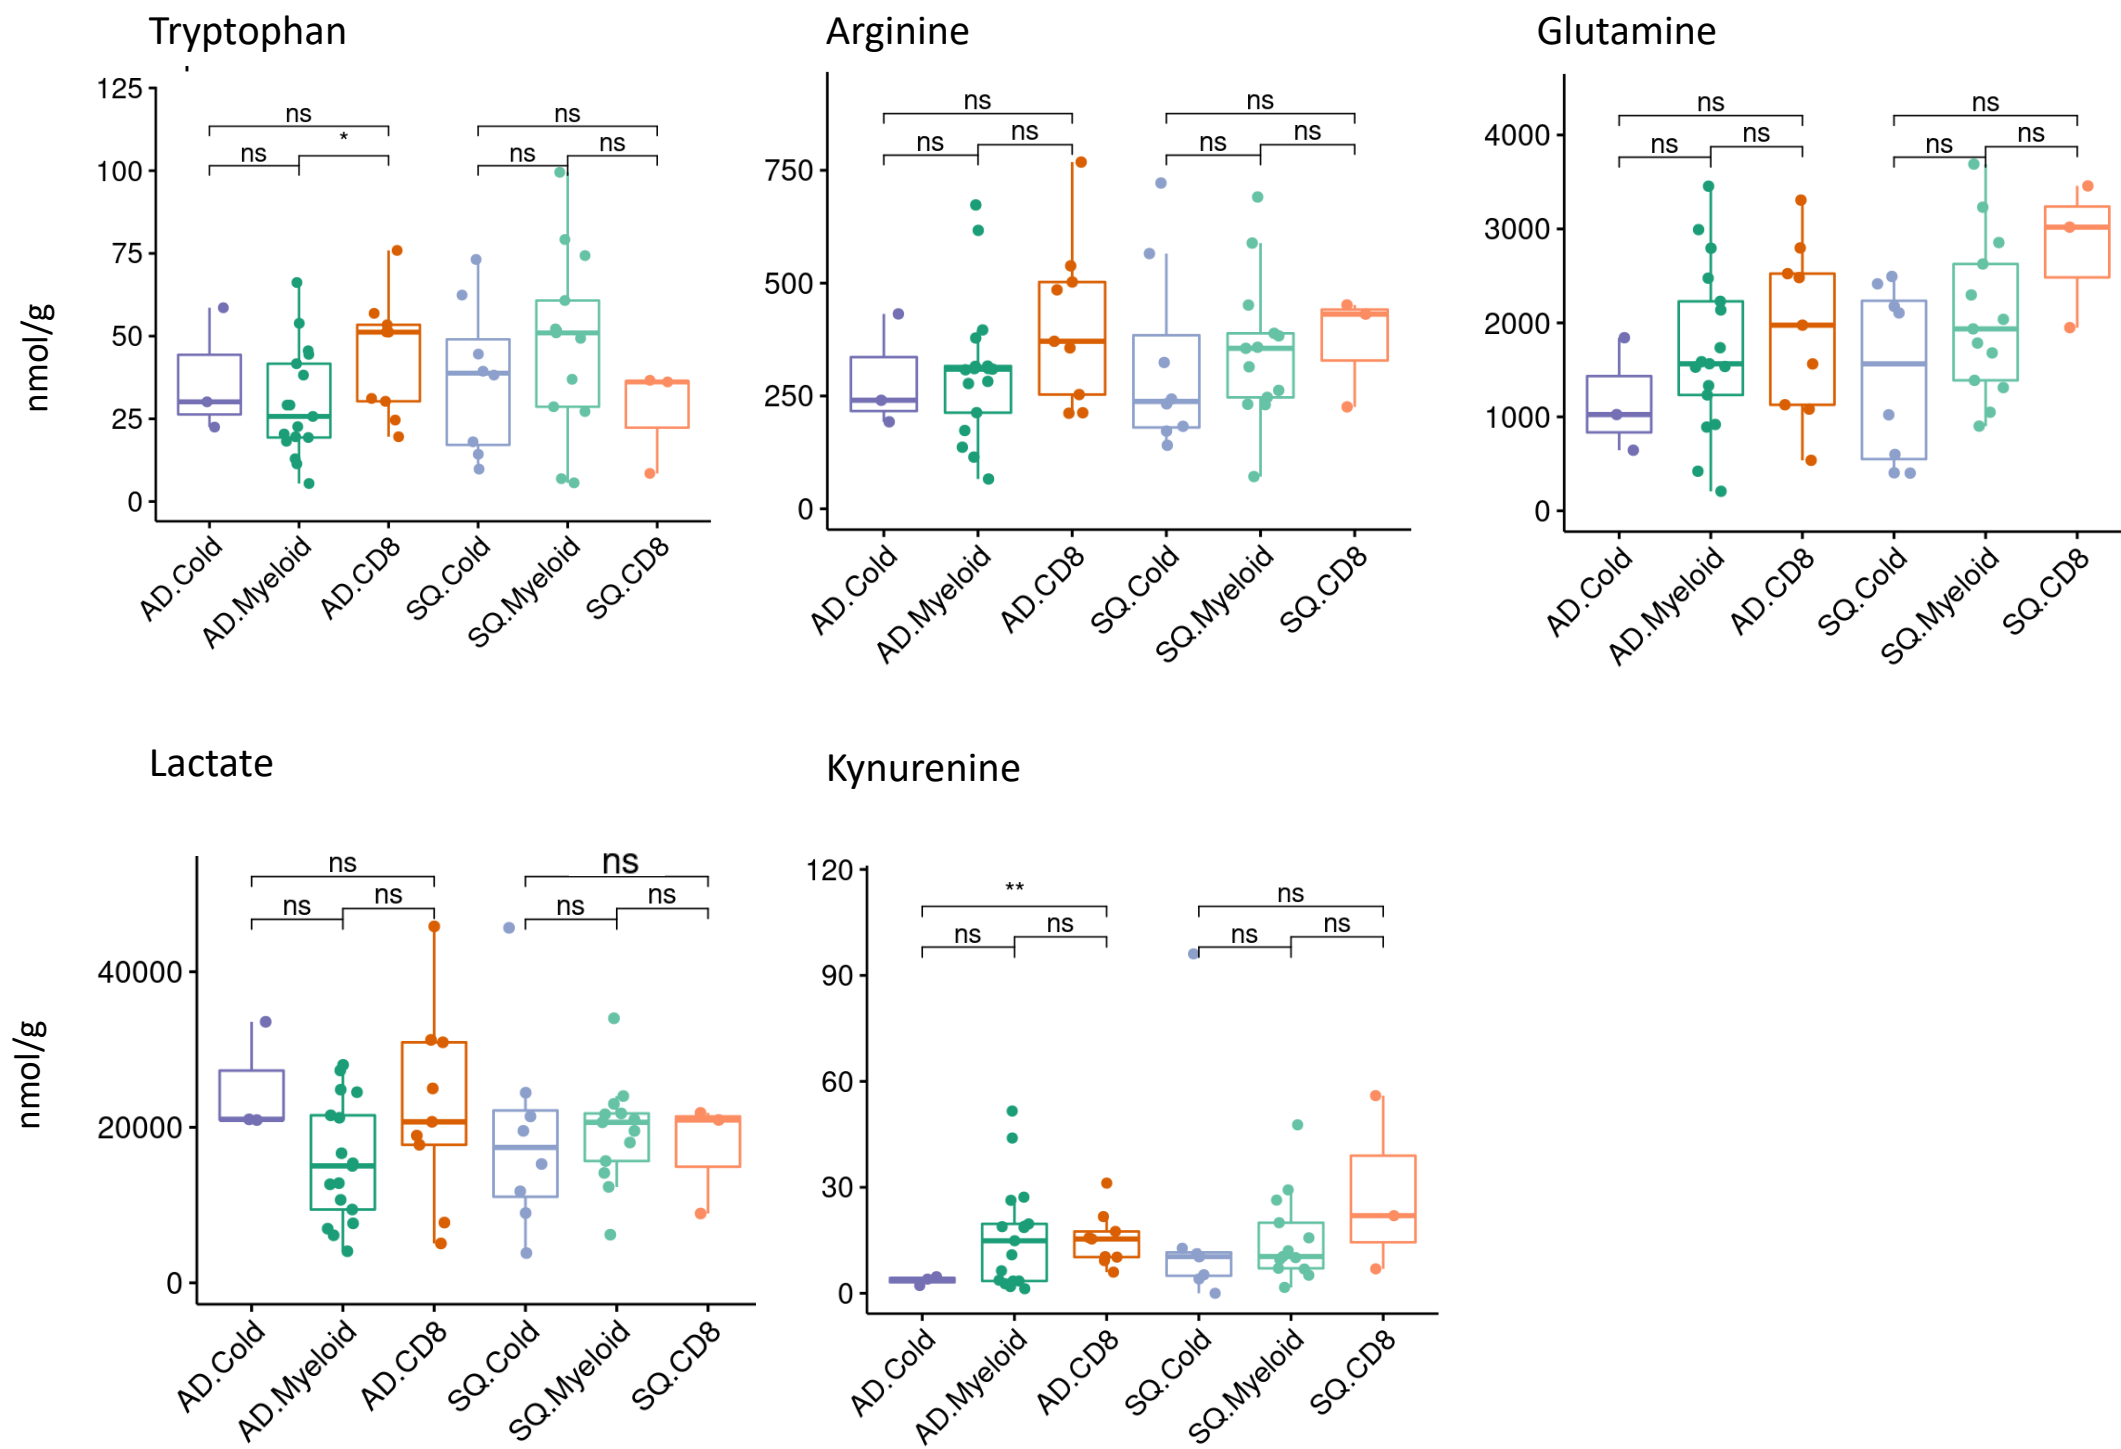

**Figure S12.** Metabolomic profiling in respective immune subtypes. Box plots showing abundances of immune-related amino acids and metabolites in LUAD (n=29) (Cold; n=3, Myeloid; n=17, CD8; n=9) and LUSQ (n=24) (Cold; n=8, Myeloid; n=13, CD8; n=3). ns; not significant. \* p<0.05. \*\*P<0.01.
