# Supplementary material for: Tumor-infiltrating Leukocyte Profiling Defines Three Immune Subtypes of NSCLC with Distinct Signaling Pathways and Genetic Alterations
Source: PubMed Central journal article supplement (PMC10263066; doi:10.1158/2767-9764.crc-22-0415), 2023-06-13
Supplement: crc-22-0415-s13.pdf [file crc-22-0415-s13.pdf]

Fig. S13

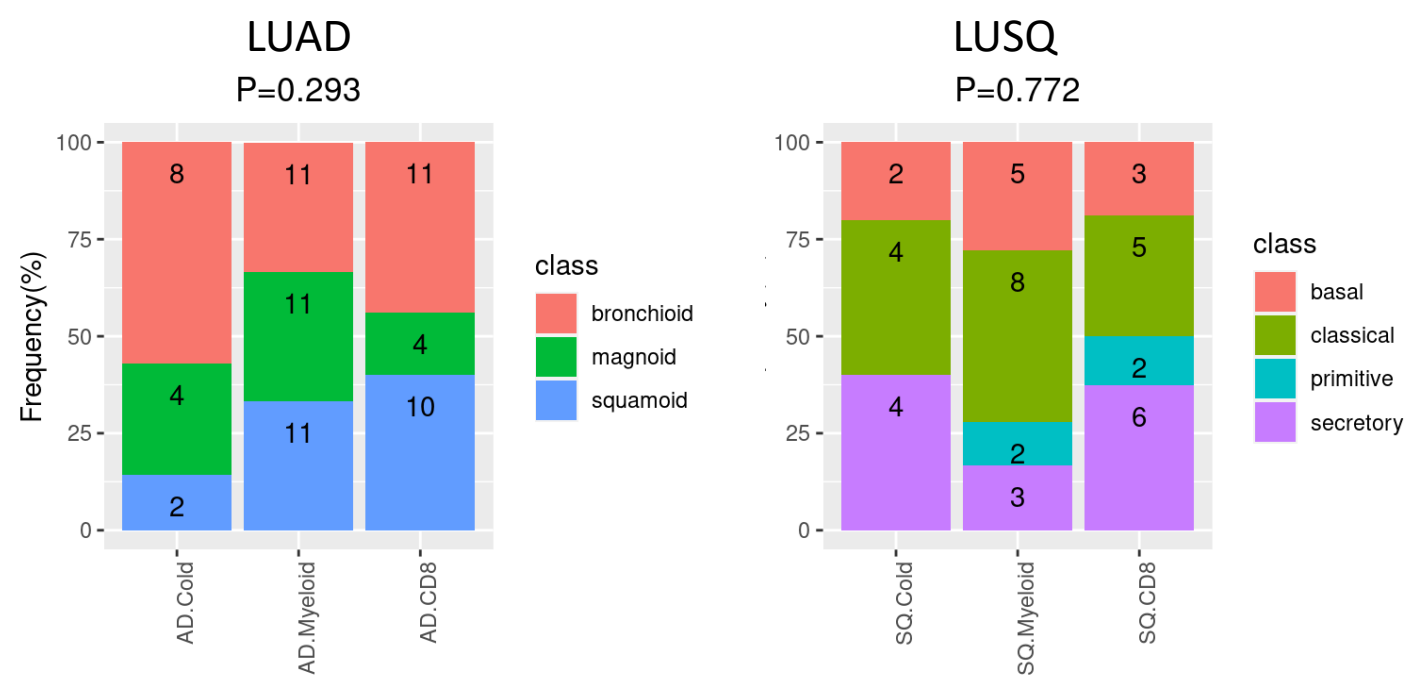

**Figure S13.** Relationship between immune subtypes and molecular subtypes. The molecular subtypes were analyzed by unsupervised consensus clustering of RNA-seq. The percentage of each molecular subtype in the immune subtype is plotted. The number of patients is specified in each column.
