# Supplementary material for: Tumor-infiltrating Leukocyte Profiling Defines Three Immune Subtypes of NSCLC with Distinct Signaling Pathways and Genetic Alterations
Source: PubMed Central journal article supplement (PMC10263066; doi:10.1158/2767-9764.crc-22-0415), 2023-06-13
Supplement: crc-22-0415-s15.pdf [file crc-22-0415-s15.pdf]

Fig. S15

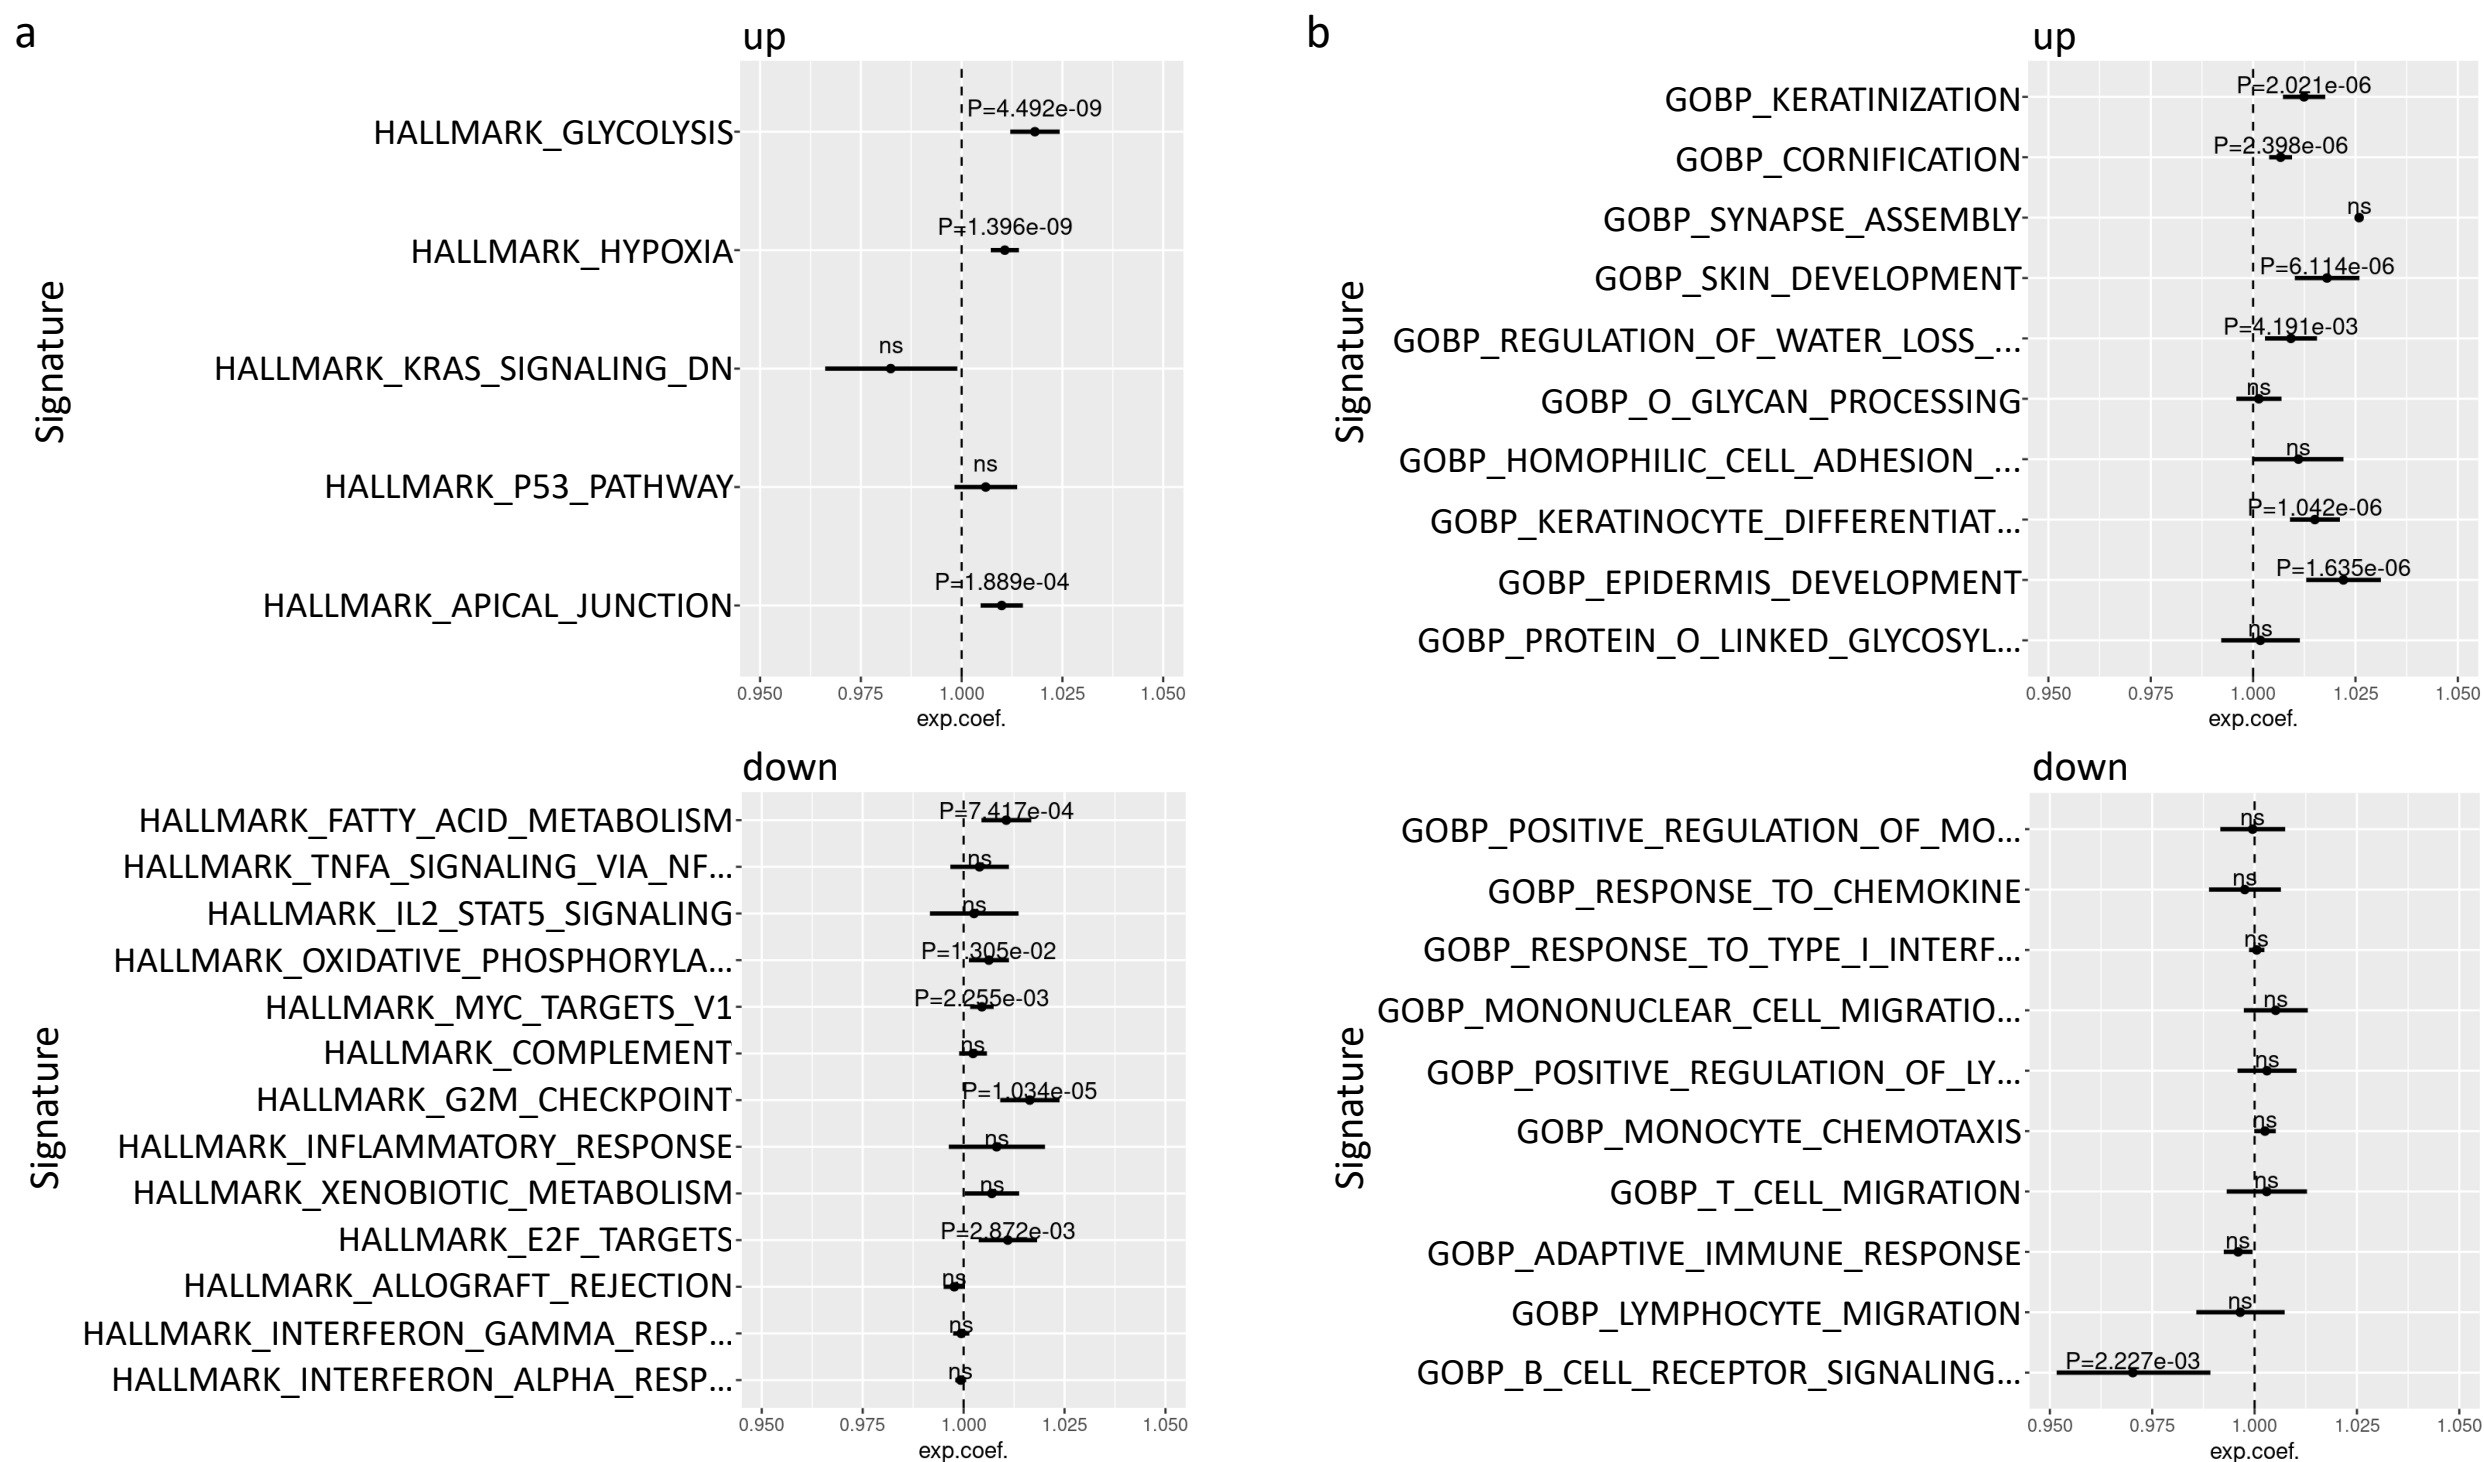

**Figure S15.** Hazard ratios with deviation for specific signatures detected in the myeloid subtype of LUAD. The relationship between increased and decreased expression of signatures and event-free survival using transcriptome data from TCGA NSCLC was plotted. (a) hallmark gene set. (b) GO set.
