# Supplementary material for: Tumor-infiltrating Leukocyte Profiling Defines Three Immune Subtypes of NSCLC with Distinct Signaling Pathways and Genetic Alterations
Source: PubMed Central journal article supplement (PMC10263066; doi:10.1158/2767-9764.crc-22-0415), 2023-06-13
Supplement: crc-22-0415-s16.pdf [file crc-22-0415-s16.pdf]

Fig. S16

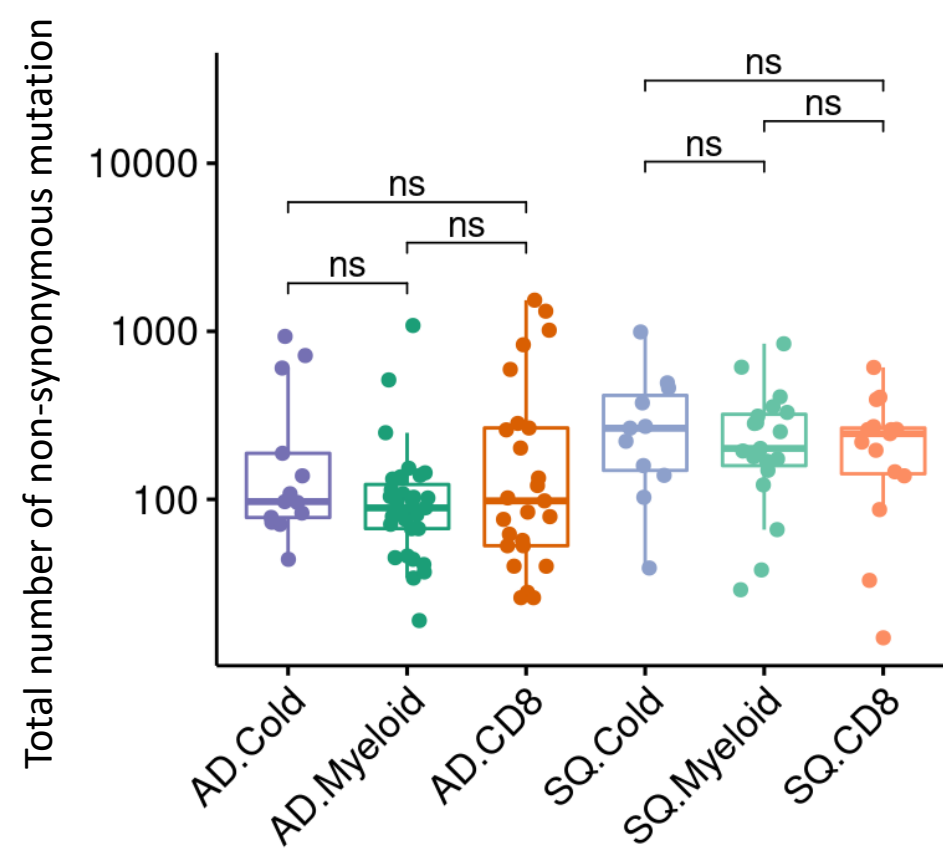

**Figure S16.** Boxplot showing the total number of non-synonymous mutations in respective immune subtypes. Non-synonymous mutations were calculated from WES data. ns; not significant.
