# Supplementary material for: Tumor-infiltrating Leukocyte Profiling Defines Three Immune Subtypes of NSCLC with Distinct Signaling Pathways and Genetic Alterations
Source: PubMed Central journal article supplement (PMC10263066; doi:10.1158/2767-9764.crc-22-0415), 2023-06-13
Supplement: crc-22-0415-s17.pdf [file crc-22-0415-s17.pdf]

Fig. S17

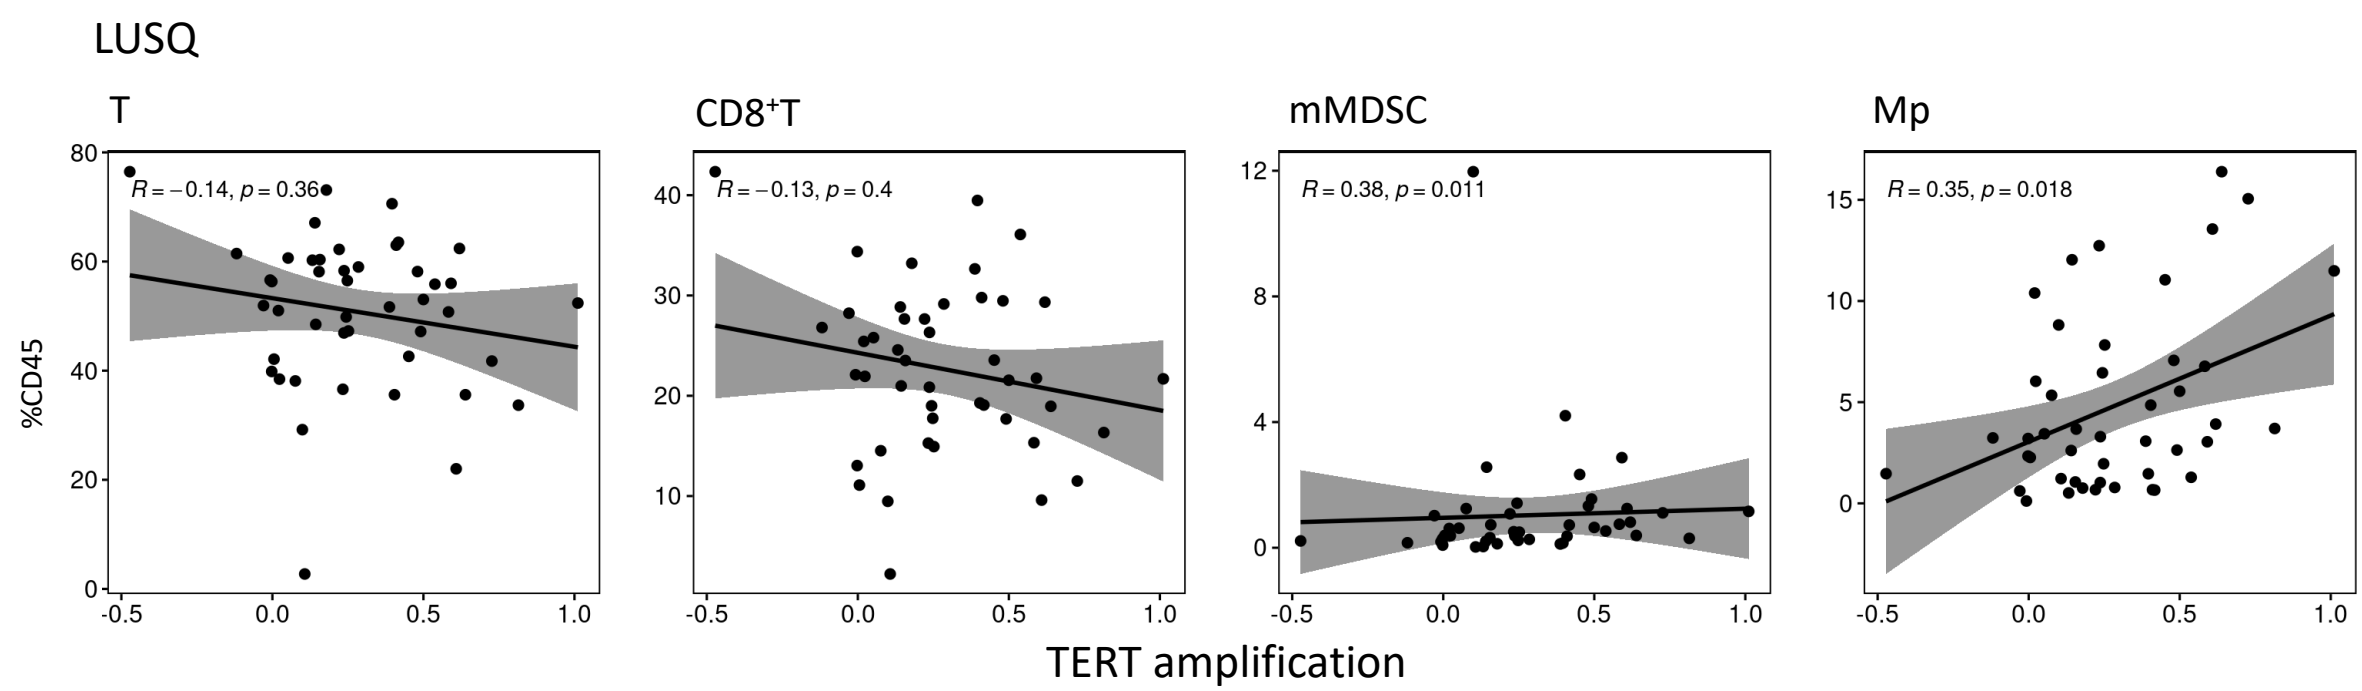

**Figure S17.** The relationship between *TERT* amplification and immune cell types in LUSQ. The correlations of the degree of *TERT* amplification with %CD45 of T, CD8<sup>+</sup> T, mMDSC, and macrophage cells are plotted.
