# Supplementary material for: Tumor-infiltrating Leukocyte Profiling Defines Three Immune Subtypes of NSCLC with Distinct Signaling Pathways and Genetic Alterations
Source: PubMed Central journal article supplement (PMC10263066; doi:10.1158/2767-9764.crc-22-0415), 2023-06-13
Supplement: crc-22-0415-s18.pdf [file crc-22-0415-s18.pdf]

Table S1

## Patient characteristics

|                    |                          | No. (%)    |
|--------------------|--------------------------|------------|
| Age (y)            | Median (range)           | 70 (28-89) |
|                    | < 65                     | 89 (31.7)  |
|                    | ≥ 65                     | 192 (68.3) |
| Sex                | Male                     | 185 (65.8) |
|                    | Female                   | 96 (34.2)  |
| Smoking history    | Yes                      | 155 (79.1) |
|                    | No                       | 41 (20.9)  |
|                    | NA                       | 85         |
| Pathological stage | 0                        | 1 (0.4)    |
|                    | I                        | 93 (33.1)  |
|                    | II                       | 84 (29.9)  |
|                    | III                      | 92 (32.7)  |
|                    | IV                       | 11 (3.9)   |
| Histology          | Adenocarcinoma           | 155 (55.2) |
|                    | Squamous cell carcinoma  | 80 (28.5)  |
|                    | Pleomorphic carcinoma    | 17 (6.1)   |
|                    | Neuroendocrine carcinoma | 20 (7.1)   |
|                    | Others                   | 9 (3.2)    |
