# Supplementary material for: Tumor-infiltrating Leukocyte Profiling Defines Three Immune Subtypes of NSCLC with Distinct Signaling Pathways and Genetic Alterations
Source: PubMed Central journal article supplement (PMC10263066; doi:10.1158/2767-9764.crc-22-0415), 2023-06-13
Supplement: crc-22-0415-s19.pdf [file crc-22-0415-s19.pdf]

Table S2

## Antibodies for FACS

| Target antigen | Clone      | Isotype | Label    | Manufacturer  | Cat. No.        | RRID                    |
|----------------|------------|---------|----------|---------------|-----------------|-------------------------|
| CD16           | 3G8        | mIgG1k  | BUV805   | BD            | 624287 (custom) | no RRID                 |
| CD152          | BNI3       | mIgG2ak | BUV737   | BD            | 624286 (custom) | no RRID                 |
| HLA-DR         | G46-6      | mIgG2ak | BUV661   | BD            | 565073          | AB_2722500              |
| CD86           | 2331       | mIgG1k  | BUV615   | BD            | 624297 (custom) | no RRID                 |
| CD8            | RPA-T8     | mIgG1k  | BUV563   | BD            | 565695          | AB_2744461              |
| CD19           | SJ25C1     | mIgG1k  | BUV496   | BD            | 564655          | AB_2744311              |
| CD45RA         | HI100      | mIgG2bk | BUV395   | BD            | 740298          | AB_2740037              |
| CD123          | 7G3        | mIgG2ak | BV786    | BD            | 564196          | AB_2738662              |
| CD11b          | ICRF44     | mIgG1k  | BV750    | BD            | 624380 (custom) | no RRID                 |
| CD68           | Y1/82A     | mIgG2bk | BV711    | BD            | 565594          | AB_2739297              |
| CD56           | NCAM16.2   | mIgG2bk | BV650    | BD            | 564057          | AB_2738568              |
| CD326          | 9C4        | mIgG2bk | BV605    | Biolegend     | 324224          | AB_2562518              |
| CD4            | SK3        | mIgG1k  | BV570    | BD            | 624298 (custom) | no RRID                 |
| L/D            | -          | -       | BV510    | invitrogen    | L34965          | no RRID                 |
| CD197          | G043H7     | mIgG2ak | BV421    | Biolegend     | 353208          | AB_11203894             |
| CD11c          | B-Ly6      | mIgG1k  | BB790    | BD            | 624296 (custom) | no RRID                 |
| CD279          | EH12.1     | mIgG1k  | BB700    | BD            | 566460          | AB_2744348              |
| CD163          | GHI/61     | mIgG1k  | BB660    | BD            | 624295 (custom) | no RRID                 |
| CD3            | SK7        | mIgG1k  | BB630    | BD            | 624294 (custom) | no RRID                 |
| Ki67           | B56        | mIgG1k  | A488     | BD            | 558616          | AB_647087               |
| CD274          | MIH1       | mIgG1k  | PE-Cy7   | BD            | 558017          | AB_396986               |
| CD14           | TuK4       | mIgG2a  | PE-Cy5.5 | invitrogen    | MHCD1418        | AB_1464894              |
| CD206          | 19.2/ 15-2 | mIgG1k  | PE-Cy5   | BD/ Biolegend | 551136/ 321108  | AB_394066<br>/AB_571919 |
| CD33           | WM53       | mIgG1k  | PE-CF594 | BD            | 562492          | AB_2713912              |
| FoxP3          | 206D       | mIgG1k  | PE       | Biolegend     | 320108          | AB_492986               |
| CD45           | 2D1        | mIgG1k  | APC-H7   | BD            | 560178          | AB_1645479              |
