# Supplementary material for: Tumor-infiltrating Leukocyte Profiling Defines Three Immune Subtypes of NSCLC with Distinct Signaling Pathways and Genetic Alterations
Source: PubMed Central journal article supplement (PMC10263066; doi:10.1158/2767-9764.crc-22-0415), 2023-06-13
Supplement: crc-22-0415-s20.pdf [file crc-22-0415-s20.pdf]

Table S3

## Antibodies for IHC

| Primary antibody | Clone        | Antigen retrieval                  | Dilution | Manufacturer | Detection system           | Cat. No.      | RRID        |
|------------------|--------------|------------------------------------|----------|--------------|----------------------------|---------------|-------------|
| CD8              | 4B11         | Citrate buffer                     | 1:50     | Novocastra   | Envision                   | CD8-4B11-L-CE | AB_442068   |
| CD20             | L26          | Citrate buffer                     | 1:200    | Thermo       | Envision                   | MA5-13141     | AB_10983209 |
| FOXP3            | 236A/E7      | Citrate buffer                     | 1:100    | Abcam        | Envision with mouse LINKER | ab20034       | AB_445284   |
| Ki67             | MIB1         | Citrate buffer                     | 1:100    | Agilent      | Envision                   | M724001-2     | AB_2631211  |
| CD33             | EPR23051-101 | Target retrieval solution, High pH | 1:100    | Abcam        | Envision                   | ab269456      | no RRID     |
